# Supplementary material for: U–Pb dating of middle Eocene–Pliocene multiple tectonic pulses in the Alpine foreland
Source: Copernicus journal article supplement (doi:10.5194/se-12-2539-2021), 2021-11-09
Supplement: Supplementary file 1 [file se-12-2539-2021-supplement.zip]

Archive with 3 entries (3 files):
- se-12-2539-2021-supplement-title-page.pdf
- U-Pb Data_Smeraglia et al.xls
- Supplementary Material_Smeraglia et al..pdf
