# Supplementary material for: U–Pb dating of middle Eocene–Pliocene multiple tectonic pulses in the Alpine foreland
Source: Copernicus journal article supplement (doi:10.5194/se-12-2539-2021), 2021-11-09
Supplement: Supplementary file 1 [file se-12-2539-2021-supplement.zip › se-12-2539-2021-supplement-title-page.pdf]

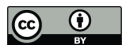

## *Supplement of*

# **U–Pb dating of middle Eocene–Pliocene multiple tectonic pulses in the Alpine foreland**

**Luca Smeraglia et al.**

*Correspondence to:* Nathan Looser ([nathan.looser@erdw.ethz.ch](mailto:nathan.looser@erdw.ethz.ch))

- [se-12-2539-2021-supplement-title-page.pdf](#)
- [Supplementary Material\\_Smeraglia et al..pdf](#)
- [U-Pb Data\\_Smeraglia et al.xls](#)

The copyright of individual parts of the supplement might differ from the article licence.
