# Supplementary material for: U–Pb dating of middle Eocene–Pliocene multiple tectonic pulses in the Alpine foreland
Source: Copernicus journal article supplement (doi:10.5194/se-12-2539-2021), 2021-11-09
Supplement: Supplementary file 1 [file se-12-2539-2021-supplement.zip › U-Pb Data_Smeraglia et al.xls]

## Sheet: Summary
Considered Age Data
Localitly	Sample Name	Lower intercept age	Error (95%)	Error+2%	Error relative (%)	Pb c	Error Pb c	n	MSWD	p(X2)	Outliers removed	Session	Comments
Arguel thrust	AR7-A	7.47	1.08	1.09028	14.5955	0.81923	0.00175	42	0.59	0.98	0	2019-09-25	-
Vue des Alpes strike-slip fault	DA1-A	44.69	2.44	2.59855	5.81462	0.7734	0.0134	40	3.3	5.6e-11	0	2019-09-26	-
Vue des Alpes strike-slip fault	DA1-C	48.4	1.21	1.54956	3.20156	0.7872	0.0172	42	3.7	3.4e-14	0	2019-09-26	-
Vue des Alpes strike-slip fault	DA2	3.88	2.9	2.90104	74.769	0.81829	0.00161	40	0.79	0.81	0	2019-09-26	-
Fuans thrust	F14-A	9.55	0.23	0.298967	3.13054	0.785	0.0049	41	1.1	0.34	0	2019-09-25	-
Fuans thrust	F14-B	9.72	1.41	1.42334	14.6434	0.786	0.0025	51	1.2	0.12	0	2019-09-25	-
Montlebon thrust	MO1-B	11.42	1.04	1.06478	9.32386	0.76257	0.00191	59	1.6	0.0045	2	2019-09-26	-
Buron strike-slip fault	BUS1	5.69	4.72	4.72137	82.9767	0.8123	0.0024	37	0.82	0.76	0	2020-09-28	-
Buron thrust	BUT1	10.63	0.49	0.534134	5.02478	0.8122	0.0152	35	1.5	0.031	0	2020-09-28	-
Pratz strike-slip fault	PR1-A	4.79	1.65	1.65278	34.5048	0.8124	0.0033	30	0.89	0.63	0	2020-09-28	-
Pratz strike-slip fault	PR2-1-A	10.48	0.36	0.416572	3.97492	0.73682	0.00262	31	1.7	0.014	0	2020-09-28	-
Pratz strike-slip fault	PR2-2	9.1	6.52	6.52254	71.6763	0.70612	0.00245	30	1.7	0.016	0	2020-09-28	-
Vue des Alpes strike-slip fault	DA1-A&C	47.67	1.05	1.41826	2.97517	0.7799	0.0108	82	3.7	0	0	2019-09-26	pooled
Fuans thrust	F14-A&B	9.577	0.14	0.23725	2.47729	0.78578	0.00158	92	1.1	0.16	0	2019-09-25	pooled
Rejected Age Data
Localitly	Sample Name	Lower intercept age	Error (95%)	Error+2%	Error relative (%)	Pb c	Error Pb c	n	MSWD	p(X2)	Outliers removed	Session	Comments
Arguel thrust	AR6-A	12	60.6	60.6005	505.004	0.8038	0.0046	34	1.1	0.27	1	2019-09-25	no spread
Arguel thrust	AR6-B	4929.65	9.76	99.0749	2.00978	0.8001	0.0045	35	0.62	0.96	0	2019-09-25	no spread
Arguel thrust	AR7-B	4946.5	22.9	101.546	2.05288	0.8105	0.0032	33	1.1	0.34	2	2019-09-25	no spread
Fuans thrust	F8-A	17.16	3.37	3.38743	19.7403	0.7775	0.0077	39	4	2e-15	0	2019-09-26	multiple age trends
Fuans thrust	F8-A	25.81	1.58	1.66219	6.44009	0.7832	0.0063	41	5.8	0	0	2020-09-23	multiple age trends
Fuans thrust	F8-A-pooled-2sessions	24.65	1.48	1.55995	6.3284	0.7832	0.0052	80	6.1	0	0	23.09.2020 / 26.09.20	multiple age trends
Montlebon thrust	MO2-A	175.9	159.9	159.939	90.9259	0.6904	0.0044	36	4.2	2.5e-15	0	2019-09-26	no spread
Pratz strike-slip fault	PR1-2	4.54	10.08	10.0804	222.035	0.8117	0.0025	39	0.65	0.95	0	2020-09-28	large uncerainity
Pratz strike-slip fault	PR2-1-B	7.29	1.89	1.89562	26.003	0.7424	0.0094	30	8.5	0	0	2020-09-28	multiple age trends/high MSWD
Pratz strike-slip fault	PR2-1-C	0.72	4.52	4.52002	627.781	0.7601	0.0022	30	0.74	0.83	0	2020-09-28	overlaps 0 Ma

## Sheet: 2020-09-28
Raw Data											Final Data (WC-1 corrected)
	Crater Size	Pulse rate	ErrorCorrelation_38_6vs7_6	Pb206_CPS	Pb206_CPS_Int2SE	Pb207_CPS	Pb207_CPS_Int2SE	U238_CPS	U238_CPS_Int2SE		corr 238/206	1SE prop	ROM 207/206 corr	1SE	err corr
ASH15D_1	163	7.4	0.17873	381	23	163	16	440000	13000		1052	35.629	0.42861	0.0246504	0.17873
ASH15D_2	163	7.4	-0.066987	688	32	244	35	1091000	18000		1444.7	40.0465	0.355305	0.0267398	-0.066987
ASH15D_3	163	7.4	0.12374	427	20	192	18	449400	2000		960.338	29.1066	0.450478	0.0235614	0.12374
ASH15D_4	163	7.4	0.039385	861	33	300	24	1377900	7700		1449.03	38.6072	0.349074	0.0154542	0.039385
ASH15D_5	163	7.4	0.42762	561	30	199	15	691000	13000		1163.81	36.6351	0.355378	0.0163917	0.42762
ASH15D_6	163	7.4	0.010541	629	26	164	15	1165500	8400		1636.12	45.029	0.261212	0.0130848	0.010541
ASH15D_7	163	7.4	0.22166	891	32	186	15	1642700	8500		1683.34	44.7964	0.209139	0.0092145	0.22166
ASH15D_8	163	7.4	0.12472	398	24	168	16	440100	5500		999.03	37.4683	0.422889	0.0237909	0.12472
ASH15D_9	163	7.4	0.22383	691	30	176	16	1194000	8900		1588.51	44.9107	0.255173	0.0128299	0.22383
ASH15D_10	163	7.4	0.047846	786	43	252	21	1153900	3900		1345.99	45.4475	0.321202	0.0159802	0.047846
ASH15D_11	163	7.4	0.066482	842	29	196	17	1576000	20000		1723.72	44.1626	0.233208	0.0108618	0.066482
ASH15D_12	163	7.4	0.5208	200	16	106	10	156200	2700		721.18	31.0304	0.530977	0.0327787	0.5208
ASH15D_13	163	7.4	0.11835	547	24	193	16	836800	8300		1400.77	43.3713	0.353484	0.0165472	0.11835
ASH15D_14	163	7.4	0.1244	688	28	154	14	1294000	22000		1723.47	50.7142	0.22425	0.0111474	0.1244
ASH15D_15	163	7.4	0.27268	558	33	138	13	913100	7500		1500.25	52.2816	0.247768	0.013754	0.27268
ASH15D_16	163	7.4	0.039538	523	21	144	15	927700	7300		1642	47.0856	0.275842	0.0153688	0.039538
ASH15D_17	163	7.4	0.12632	399	18	129	13	648800	6500		1473.71	45.1911	0.323904	0.0178486	0.12632
ASH15D_18	163	7.4	0.51217	589	23	119	10	1130000	15000		1781.54	48.4547	0.20241	0.00936073	0.51217
ASH15D_19	163	7.4	0.22972	446	41	161	14	552500	5300		1121.81	56.6445	0.361652	0.0228395	0.22972
ASH15D_20	163	7.4	0.0261	1174	46	244	28	2328000	25000		1828.72	49.1458	0.20822	0.012601	0.0261
ASH15D_21	163	7.4	0.056025	882	35	190	23	1652000	22000		1721.34	47.2692	0.215817	0.0137212	0.056025
ASH15D_22	163	7.4	0.058055	521	31	162	16	739000	24000		1253.29	48.8995	0.311514	0.0179263	0.058055
ASH15D_23	163	7.4	0.41902	436	21	161	14	709100	3600		1480.64	45.7413	0.369947	0.0183534	0.41902
ASH15D_24	163	7.4	0.03097	657	24	225	24	1161000	13000		1613.87	41.3016	0.343097	0.0193062	0.03097
ASH15D_25	163	7.4	0.28984	1234	28	326	18	2067300	8300		1521.6	35.3448	0.264668	0.00788519	0.28984
BUS1_1	110	5	0.25003	45220	800	36760	630	1537	67		0.0295251	0.00145111	0.814413	0.0100116	0.25003
BUS1_2	110	5	0.24685	18200	260	14390	190	2220	160		0.109925	0.00462545	0.792117	0.00769033	0.24685
BUS1_3	110	5	0.32424	48060	380	38980	310	89400	1300		1.70587	0.0360472	0.812564	0.00454785	0.32424
BUS1_4	110	5	0.17526	20490	270	16580	230	65620	540		2.9496	0.0631731	0.810667	0.007741	0.17526
BUS1_5	110	5	0.2864	19660	130	15920	110	31870	640		1.46447	0.0330359	0.811259	0.00387221	0.2864
BUS1_6	110	5	0.13308	11900	180	9660	140	6860	220		0.514838	0.0146256	0.813261	0.0085026	0.13308
BUS1_7	110	5	0.17493	14211	99	11461	95	16560	260		1.06848	0.0231156	0.807974	0.00436619	0.17493
BUS1_8	110	5	0.16155	29430	360	23990	320	6760	220		0.209799	0.00496053	0.816657	0.00737656	0.16155
BUS1_9	110	5	0.011613	41080	200	33280	200	3704	98		0.0833484	0.00201827	0.81162	0.00313285	0.011613
BUS1_10	110	5	0.13053	40620	510	32800	420	399000	4400		9.01159	0.187096	0.808972	0.00724042	0.13053
BUS1_11	110	5	0.011418	5417	76	4370	66	4230	220		0.707348	0.0246017	0.808207	0.00831487	0.011418
BUS1_12	110	5	0.014838	5480	170	4450	150	14200	1600		2.0241	0.0977922	0.813541	0.0186	0.014838
BUS1_13	110	5	0.35464	13780	210	11140	170	21200	350		1.40172	0.0308854	0.809908	0.00871742	0.35464
BUS1_14	110	5	0.19412	16420	130	13270	110	59430	970		3.3246	0.0704578	0.80965	0.00463189	0.19412
BUS1_15	110	5	0.37159	11911	96	9636	87	85800	1200		6.63948	0.140688	0.810491	0.00489556	0.37159
BUS1_16	110	5	0.47271	43590	280	35370	210	20520	270		0.429313	0.00915057	0.81292	0.00354881	0.47271
BUS1_17	110	5	0.20432	21670	790	17290	610	14400	1000		0.592191	0.0185731	0.799348	0.020239	0.20432
BUS1_18	110	5	0.25209	21460	160	17300	150	174600	1600		7.45014	0.153707	0.807637	0.00460929	0.25209
BUS1_19	110	5	0.27617	20120	250	15870	200	450000	11000		20.5448	0.445512	0.790221	0.00697972	0.27617
BUS1_20	110	5	0.39797	24900	180	20140	140	83900	710		3.08681	0.0636898	0.810326	0.00405585	0.39797
BUS1_21	110	5	0.59108	44600	670	35390	220	35590	400		0.732516	0.0161451	0.79496	0.00645028	0.59108
BUS1_22	110	5	0.3221	29810	570	23730	320	381500	7000		11.5238	0.302171	0.797509	0.00931286	0.3221
BUS1_23	110	5	0.31256	97800	3000	79200	2400	10220	300		0.0960091	0.00229617	0.811309	0.0174591	0.31256
BUS1_24	110	5	0.32358	21270	150	17170	140	68230	820		2.94979	0.0610521	0.808728	0.00435119	0.32358
BUS1_25	110	5	0.28841	21350	200	17470	160	37590	550		1.60552	0.0343718	0.819775	0.00536	0.28841
BUS1_26	110	5	0.23703	19490	210	15990	190	82500	2300		3.81993	0.0994332	0.821933	0.00657985	0.23703
BUS1_27	110	5	0.28512	18420	150	14890	110	98600	1200		4.88111	0.105294	0.80985	0.00444394	0.28512
BUS1_28	110	5	-0.087599	14560	120	11790	120	1836	76		0.113929	0.00379596	0.811245	0.0053025	-0.087599
BUS1_29	110	5	0.1621	24760	310	20060	260	8800	390		0.313529	0.0081796	0.811671	0.00729999	0.1621
BUS1_30	110	5	-0.020823	45850	410	37200	380	55880	930		1.1171	0.0258389	0.812837	0.00550742	-0.020823
BUS1_31	110	5	0.40051	48360	910	38490	720	56040	700		1.06289	0.0237296	0.797373	0.0105589	0.40051
BUS1_32	110	5	-0.077892	37220	270	30300	230	196900	1600		4.86746	0.0997515	0.815579	0.00427377	-0.077892
BUS1_33	110	5	0.11289	62140	560	50290	480	7600	170		0.111972	0.00255817	0.810793	0.0053118	0.11289
BUS1_34	110	5	0.16654	22400	350	18260	300	33600	1200		1.35549	0.031525	0.816681	0.00924127	0.16654
BUS1_35	110	5	0.022239	42080	550	34240	450	126900	3100		2.69896	0.0720012	0.815188	0.007541	0.022239
BUS1_36	110	5	0.14073	27810	260	22510	210	25660	390		0.841977	0.0177237	0.810913	0.00534525	0.14073
BUS1_37	110	5	0.14137	25870	560	20700	460	119500	4500		4.14713	0.108153	0.801629	0.0124115	0.14137
BUT1_1	163	7.4	0.13187	569	25	375	32	72410	690		116.119	3.38687	0.660266	0.0316279	0.13187
BUT1_2	163	7.4	0.46909	816	42	708	49	12290	510		13.5625	0.424036	0.869246	0.0374174	0.46909
BUT1_3	163	7.4	0.13211	468	18	364	16	5450	150		10.3866	0.312172	0.779211	0.022714	0.13211
BUT1_4	163	7.4	0.44372	773	25	467	23	129000	2000		150.537	3.84371	0.605253	0.017798	0.44372
BUT1_5	163	7.4	0.23285	862	36	356	24	310600	2900		324.294	9.11896	0.413754	0.0163759	0.23285
BUT1_6	163	7.4	0.55182	1003	51	769	29	16880	290		15.0305	0.510444	0.768113	0.0242682	0.55182
BUT1_7	163	7.4	0.44765	495	24	276	16	90470	600		165.126	5.2451	0.558603	0.0210691	0.44765
BUT1_8	163	7.4	0.61596	406	21	279	16	35610	490		78.2822	2.64844	0.688459	0.0265352	0.61596
BUT1_9	163	7.4	0.051962	596	35	177	37	305100	3200		461.733	15.9249	0.297527	0.0322419	0.051962
BUT1_10	163	7.4	0.38636	734	32	417	23	146250	820		180.649	5.37155	0.569167	0.0199709	0.38636
BUT1_11	163	7.4	-0.00028449	563	31	282	32	185000	2600		298.714	9.51569	0.501811	0.0315882	-0.00028449
BUT1_12	163	7.4	0.38643	461	21	369	20	5560	150		10.9983	0.346514	0.801909	0.0283358	0.38643
BUT1_13	163	7.4	0.099923	846	44	167	20	473800	2700		506.838	16.2101	0.197763	0.0128869	0.099923
BUT1_14	163	7.4	-0.068464	488	24	374	24	26840	530		49.932	1.69146	0.767806	0.0309813	-0.068464
BUT1_15	163	7.4	0.043237	3880	380	2940	300	139700	2100		33.9072	1.61094	0.759129	0.0535854	0.043237
BUT1_16	163	7.4	-0.10253	1710	160	1250	140	148900	1500		78.0498	3.71044	0.732342	0.0533411	-0.10253
BUT1_17	163	7.4	0.37608	911	36	650	33	91300	1500		89.5139	2.81391	0.714817	0.0229519	0.37608
BUT1_18	163	7.4	0.47066	428	27	297	20	29600	330		62.221	2.36448	0.695204	0.0320153	0.47066
BUT1_19	163	7.4	0.055056	444	23	153	25	207600	2700		423.362	13.8007	0.34523	0.0295341	0.055056
BUT1_20	163	7.4	0.42538	590	24	315	17	135800	1900		208.767	6.02223	0.534882	0.0180408	0.42538
BUT1_21	163	7.4	0.43982	740	25	585	21	5850	200		7.00779	0.219032	0.791998	0.0194847	0.43982
BUT1_22	163	7.4	0.28619	356	17	74.7	7.3	169400	1600		430.892	12.8619	0.210218	0.0114114	0.28619
BUT1_23	163	7.4	0.39362	579	22	193	12	230900	4400		354.431	9.73541	0.333948	0.0121445	0.39362
BUT1_24	163	7.4	0.50776	312	17	219	14	22040	310		62.8528	2.2586	0.703217	0.0294797	0.50776
BUT1_25	163	7.4	0.090128	459	18	366	21	14630	290		28.7744	0.827928	0.798855	0.0277084	0.090128
BUT1_26	163	7.4	0.39383	1838	42	1281	35	198900	1400		97.9949	2.34039	0.698238	0.0124122	0.39383
BUT1_27	163	7.4	0.40753	2127	43	1692	40	28680	300		12.1191	0.27542	0.796953	0.0123722	0.40753
BUT1_28	163	7.4	0.09298	482	30	407	42	7990	280		14.8132	0.588724	0.845955	0.0508797	0.09298
BUT1_29	163	7.4	0.27317	359	30	199	26	92800	4300		231.282	11.3188	0.555339	0.042985	0.27317
BUT1_30	163	7.4	0.32855	454	23	339	20	40520	790		81.0988	2.6019	0.748072	0.0290329	0.32855
BUT1_31	163	7.4	0.37891	1690	160	1300	120	32050	590		17.8142	0.754842	0.770649	0.0508565	0.37891
BUT1_32	163	7.4	0.15008	599	42	294	24	176390	900		266.706	10.8263	0.491723	0.0264089	0.15008
BUT1_33	163	7.4	0.5887	563	31	315	17	90500	1400		147.697	4.66805	0.560534	0.0215688	0.5887
BUT1_34	163	7.4	0.58057	643	27	526	21	21670	360		30.0363	0.958736	0.819548	0.023699	0.58057
BUT1_35	163	7.4	0.32498	661	26	262	16	233900	1500		322.831	9.04612	0.3971	0.0143961	0.32498
C_WC1_1	110	5	0.24342	38230	380	4265	86	986000	14000		23.1947	0.471986	0.111767	0.001254	0.24342
C_WC1_2	110	5	-0.013295	34200	200	4015	95	880800	9800		23.2437	0.477666	0.117614	0.00143068	-0.013295
C_WC1_3	110	5	0.13582	37080	250	4338	66	977600	9400		23.6647	0.481834	0.117206	0.000973438	0.13582
C_WC1_4	110	5	0.14694	32950	270	3988	70	786600	8500		21.6863	0.440455	0.121255	0.00117226	0.14694
C_WC1_5	110	5	0.23055	39750	220	4655	64	1006500	7400		23.0081	0.466218	0.117323	0.000867811	0.23055
C_WC1_6	110	5	0.10209	41240	200	4978	61	980300	7500		21.6013	0.44139	0.120931	0.000795387	0.10209
C_WC1_7	110	5	-0.13584	40250	480	5640	190	922500	7400		20.897	0.439334	0.140383	0.00250377	-0.13584
C_WC1_8	110	5	0.091225	30590	360	3041	75	773000	11000		22.9262	0.469499	0.0995948	0.00135831	0.091225
C_WC1_9	110	5	-0.0077282	34580	250	4222	79	817900	9300		21.467	0.439492	0.122319	0.00122458	-0.0077282
C_WC1_10	110	5	-0.10075	36680	220	4299	70	847800	8500		21.1911	0.433567	0.117419	0.00101687	-0.10075
C_WC1_11	110	5	-0.51755	52680	390	4460	130	1315400	8700		22.6159	0.465833	0.0848182	0.00127304	-0.51755
C_WC1_12	110	5	-0.24778	34020	210	2656	73	877500	5400		23.4846	0.476938	0.0782156	0.00109962	-0.24778
C_WC1_13	110	5	0.20468	33460	240	2390	49	860500	9100		23.4775	0.477241	0.0715602	0.000775735	0.20468
C_WC1_14	110	5	0.27096	38210	560	3211	72	961000	17000		22.8745	0.465614	0.0841905	0.00112556	0.27096
C_WC1_15	110	5	0.10111	32210	170	2106	52	827700	5200		23.4804	0.48	0.0655039	0.000825438	0.10111
C_WC1_16	110	5	-0.1188	36040	220	4939	70	822500	6900		20.9205	0.426387	0.137295	0.00105739	-0.1188
C_WC1_17	110	5	0.22761	38590	430	4567	70	955000	13000		22.7022	0.461046	0.118565	0.00112131	0.22761
C_WC1_18	110	5	0.32432	18470	210	2482	74	433700	5100		21.4059	0.439061	0.134628	0.00214397	0.32432
C_WC1_19	110	5	-0.4451	29180	270	3400	83	696100	7300		22.0077	0.46129	0.116733	0.00152094	-0.4451
C_WC1_20	110	5	0.47089	38610	330	4464	72	952000	9900		22.6649	0.462656	0.115831	0.00105522	0.47089
C_WC1_21	110	5	0.57728	25500	300	2893	70	620700	8400		22.3844	0.46126	0.11366	0.00152619	0.57728
C_WC1_22	110	5	0.10315	32880	310	4145	71	825400	7600		23.0945	0.46872	0.126297	0.00123243	0.10315
C_WC1_23	110	5	-0.0029152	36330	210	3908	55	957200	9400		24.2506	0.493862	0.107768	0.000818309	-0.0029152
C_WC1_24	110	5	0.1728	33600	210	3085	46	888200	6500		24.232	0.492398	0.0919847	0.000742225	0.1728
C_WC1_25	110	5	0.017502	34570	250	3783	59	913600	9800		24.3392	0.498126	0.109632	0.000940615	0.017502
C_WC1_26	110	5	0.2174	29720	140	3148	49	823400	4800		25.4908	0.517541	0.106117	0.000861284	0.2174
C_WC1_27	110	5	-0.037514	33480	280	4195	70	835800	9200		22.922	0.46753	0.12553	0.00116935	-0.037514
C_WC1_28	110	5	0.021961	37260	200	3979	58	952100	6700		23.5534	0.47925	0.106987	0.000829408	0.021961
C_WC1_29	110	5	-0.011797	34660	200	3857	66	907100	6800		24.0638	0.490498	0.111486	0.00100478	-0.011797
C_WC1_30	110	5	0.12466	27740	220	3022	50	740800	7800		24.4855	0.498232	0.109141	0.000999412	0.12466
C_WC1_31	110	5	0.25604	33280	170	4219	58	799200	5600		22.0443	0.447349	0.127007	0.000929606	0.25604
C_WC1_32	110	5	0.12962	35800	230	3574	55	896000	7800		22.963	0.46516	0.100016	0.00083241	0.12962
C_WC1_33	110	5	0.27843	36810	260	3748	53	940300	9900		23.4539	0.482487	0.102008	0.000804725	0.27843
C_WC1_34	110	5	0.16859	33500	320	4012	60	848000	11000		23.1187	0.470721	0.119982	0.00106261	0.16859
C_WC1_35	110	5	0.28087	28340	350	3704	67	695700	9000		22.3712	0.453761	0.13094	0.00143131	0.28087
C_WC1_36	110	5	0.17377	29340	160	2914	45	778000	5800		24.2659	0.494264	0.0995014	0.000813282	0.17377
C_WC1_37	110	5	0.25629	33820	260	4042	62	825800	8900		22.2145	0.453794	0.119735	0.0010253	0.25629
C_WC1_38	110	5	0.34864	32020	200	3256	49	799800	6500		22.8923	0.465558	0.101874	0.000828433	0.34864
C_WC1_39	110	5	0.17001	39310	320	4295	74	1026300	9200		23.7669	0.482349	0.109461	0.00104101	0.17001
C_WC1_40	110	5	0.059329	38270	260	4078	57	951000	10000		22.4591	0.457535	0.106755	0.000828018	0.059329
G_NIST614_1	110	5	0.28309	109800	1000	95490	870	164500	1500		1.35191	0.0273009	0.871275	0.0056017	0.28309
G_NIST614_2	110	5	0.27311	110380	950	96160	830	164500	1700		1.34735	0.027232	0.872778	0.00530944	0.27311
G_NIST614_3	110	5	-0.018177	111800	1200	97000	1000	167900	1800		1.36079	0.0275922	0.86922	0.00645617	-0.018177
G_NIST614_4	110	5	0.1922	109600	1200	95600	1100	163800	1700		1.36172	0.0275807	0.873871	0.00692712	0.1922
G_NIST614_5	110	5	-0.02362	110000	1100	95300	1000	165400	1600		1.36484	0.0276025	0.867961	0.006279	-0.02362
G_NIST614_6	110	5	0.39905	109100	1100	94690	930	162400	1600		1.35735	0.0275638	0.869519	0.00610819	0.39905
G_NIST614_7	110	5	0.33942	108300	1100	93900	1000	161300	1500		1.36286	0.0275869	0.868634	0.00637992	0.33942
G_NIST614_8	110	5	0.42377	107700	1000	93930	930	159700	1600		1.3535	0.0273796	0.873752	0.00591906	0.42377
G_NIST614_9	110	5	0.31048	107800	1100	93590	980	160000	1500		1.36188	0.0275787	0.869782	0.00634678	0.31048
G_NIST614_10	110	5	0.31687	106600	1100	92740	990	157600	1600		1.35648	0.0274804	0.871585	0.00645835	0.31687
G_NIST614_11	110	5	0.32173	107000	1100	93080	980	157500	1500		1.35411	0.027403	0.87151	0.00640042	0.32173
G_NIST614_12	110	5	0.31521	106300	1100	92130	980	155600	1400		1.34344	0.0271447	0.868296	0.00643098	0.31521
G_NIST614_13	110	5	0.01754	105800	1000	91970	930	154900	1500		1.34637	0.0272833	0.870884	0.00601611	0.01754
G_NIST614_14	110	5	0.33337	104200	1100	90760	920	154300	1600		1.36487	0.0275965	0.872623	0.00637382	0.33337
G_NIST614_15	110	5	0.40748	104900	1100	91240	940	155000	1500		1.35956	0.0275558	0.871384	0.00639306	0.40748
G_NIST614_16	110	5	0.4301	103700	1100	90180	920	153000	1400		1.36034	0.0275722	0.871227	0.00639922	0.4301
G_NIST614_17	110	5	0.69923	103200	1100	89660	940	152000	1500		1.3542	0.0274455	0.8704	0.00649464	0.69923
G_NIST614_18	110	5	0.31568	105100	1200	91400	1000	154100	1600		1.35268	0.0274149	0.871251	0.0068761	0.31568
G_NIST614_19	110	5	0.42897	105100	1100	91410	950	155600	1700		1.35878	0.0274999	0.871346	0.00641418	0.42897
G_NIST614_20	110	5	0.28401	103050	960	89700	870	154000	1500		1.36956	0.0277376	0.872056	0.00585303	0.28401
G_NIST614_21	110	5	0.43767	103490	940	90040	800	155000	1600		1.36373	0.0276193	0.871639	0.00552735	0.43767
G_NIST614_22	110	5	0.28415	104500	1100	90560	930	154700	1500		1.34591	0.0272009	0.8682	0.0063721	0.28415
G_NIST614_23	110	5	0.35417	103300	1100	89800	1000	153200	1600		1.34425	0.0272489	0.870915	0.00669709	0.35417
G_NIST614_24	110	5	0.081279	101700	1200	88100	1000	151600	1500		1.34802	0.027342	0.86787	0.00709162	0.081279
G_NIST614_25	110	5	0.31952	100400	1100	87390	940	153000	1500		1.37585	0.0279039	0.872023	0.00668209	0.31952
JT_1	163	7.4	0.077822	50900	3000	39000	2300	414000	13000		7.5462	0.267095	0.767621	0.0319422	0.077822
JT_2	163	7.4	0.26638	1246	34	682	29	231200	2300		166.777	4.14986	0.54836	0.0138273	0.26638
JT_3	163	7.4	0.42816	901	47	317	23	280000	13000		281.188	7.12307	0.35248	0.01572	0.42816
JT_4	163	7.4	0.023733	907	32	304	26	314100	2300		314.29	8.04629	0.335789	0.0155046	0.023733
JT_5	163	7.4	0.059949	2580	200	1910	210	222200	1500		76.5556	3.391	0.741675	0.0497962	0.059949
JT_6	163	7.4	-0.14805	4530	540	2960	320	97300	2100		19.936	1.2645	0.654626	0.0525764	-0.14805
JT_7	163	7.4	0.21477	833	31	183	15	321500	3700		353.098	9.32705	0.220093	0.00988813	0.21477
JT_8	163	7.4	0.065219	1794	38	197	16	779200	4600		395.104	8.92055	0.110013	0.00460847	0.065219
JT_9	163	7.4	0.27945	1484	40	252	19	614500	8600		376.948	8.79504	0.170124	0.0067984	0.27945
JT_10	163	7.4	-0.06197	37200	1800	27900	1400	430600	5900		10.5456	0.326504	0.751382	0.0261407	-0.06197
JT_11	163	7.4	0.20857	750	29	181	16	288800	3000		349.268	9.16374	0.241778	0.0116425	0.20857
JT_12	163	7.4	0.090766	711	41	330	32	182600	2900		234.341	7.14341	0.464991	0.0261819	0.090766
JT_13	163	7.4	0.18383	820	30	235	20	322400	3200		360.86	9.36409	0.287114	0.0132742	0.18383
JT_14	163	7.4	-0.058204	1271	39	201	20	555800	8100		396.99	9.81257	0.158435	0.00823343	-0.058204
JT_15	163	7.4	-0.12618	167000	22000	123000	16000	1080000	100000		6.67473	0.276404	0.737885	0.0681791	-0.12618
JT_16	163	7.4	-0.15177	6490	550	4610	430	285200	2300		40.0488	1.91752	0.711633	0.0447591	-0.15177
JT_17	163	7.4	0.12531	950	41	239	21	361000	6100		350.769	9.42796	0.252043	0.0123139	0.12531
JT_18	163	7.4	-0.015537	820	31	188	18	329400	3300		371.115	10.0325	0.229691	0.0118002	-0.015537
JT_19	163	7.4	0.21667	727	33	281	23	221000	1600		280.499	8.21411	0.387232	0.0180881	0.21667
JT_20	163	7.4	0.14284	980	40	304	24	361900	4100		336.627	9.05481	0.310776	0.0137846	0.14284
JT_21	163	7.4	0.01017	711	33	246	23	210900	2500		276.429	8.04326	0.346629	0.0180577	0.01017
JT_22	163	7.4	0.11836	648	33	328	26	137200	1900		194.836	5.68995	0.507106	0.0238451	0.11836
JT_23	163	7.4	0.21525	522	34	217	26	139200	1500		244.374	8.97077	0.416475	0.0283462	0.21525
JT_24	163	7.4	0.045054	1463	72	198	30	653100	7600		407.972	12.2414	0.135588	0.0107802	0.045054
JT_25	163	7.4	0.27238	880	29	181	15	336700	1400		343.724	9.04039	0.206061	0.00917184	0.27238
PR1_fibrous_1	110	5	0.54209	122000	1600	98100	1300	301400	5000		2.25954	0.0469251	0.80558	0.00749589	0.54209
PR1_fibrous_2	110	5	0.031909	61070	430	48980	360	408000	2500		6.15269	0.125012	0.803509	0.00408167	0.031909
PR1_fibrous_3	110	5	0.15322	56590	390	45680	320	455200	4800		7.4301	0.151692	0.808698	0.0039662	0.15322
PR1_fibrous_4	110	5	0.48939	56540	420	45710	290	347600	5300		5.60947	0.122251	0.809944	0.00394885	0.48939
PR1_fibrous_5	110	5	-0.0013919	41870	420	33770	360	344400	3600		7.54147	0.153332	0.808031	0.00590301	-0.0013919
PR1_fibrous_6	110	5	0.48976	40700	240	32670	180	507100	6700		11.3302	0.24213	0.804182	0.00323899	0.48976
PR1_fibrous_7	110	5	-0.036775	23730	180	18990	170	337500	2300		13.1061	0.267773	0.801728	0.00469492	-0.036775
PR1_fibrous_8	110	5	0.1358	35590	420	28560	330	431600	2500		11.1633	0.231997	0.803952	0.00662677	0.1358
PR1_fibrous_9	110	5	-0.093035	50260	310	40640	270	341200	2600		6.22113	0.130365	0.810086	0.00366513	-0.093035
PR1_fibrous_10	110	5	0.19771	15270	120	12200	120	275300	2900		16.4909	0.352683	0.800425	0.00502935	0.19771
PR1_fibrous_11	110	5	0.06822	97800	700	79410	590	287800	2700		2.69119	0.0559969	0.81346	0.00418833	0.06822
PR1_fibrous_12	110	5	0.64141	90500	1200	73500	1000	195400	1200		1.97895	0.0426131	0.813652	0.00771469	0.64141
PR1_fibrous_13	110	5	0.27552	13130	100	10496	99	323100	3500		22.4826	0.474581	0.800864	0.00484558	0.27552
PR1_fibrous_14	110	5	0.37512	29540	200	23960	170	492900	5800		15.3615	0.319101	0.812599	0.00397732	0.37512
PR1_fibrous_15	110	5	0.33574	33450	190	26940	160	197700	1600		5.4274	0.111802	0.806866	0.00330935	0.33574
PR1_fibrous_16	110	5	0.27238	15730	140	12610	120	396600	3100		23.1116	0.477747	0.803131	0.00522264	0.27238
PR1_fibrous_17	110	5	0.25195	24440	200	19670	170	251800	3600		9.39347	0.20337	0.806312	0.00478959	0.25195
PR1_fibrous_18	110	5	0.30049	9150	140	7310	120	298400	2700		29.4304	0.630203	0.80038	0.00896404	0.30049
PR1_fibrous_19	110	5	0.2089	12280	120	9770	100	353300	3200		26.3633	0.570751	0.797069	0.00562935	0.2089
PR1_fibrous_20	110	5	0.67942	14300	200	11350	150	457600	3700		29.479	0.619112	0.795169	0.00763638	0.67942
PR1_fibrous_21	110	5	0.50709	6898	81	5499	65	247700	3400		33.1408	0.694801	0.798657	0.00664119	0.50709
PR1_fibrous_22	110	5	0.5501	10500	190	8290	140	421500	5900		36.8417	0.761392	0.790979	0.00977094	0.5501
PR1_fibrous_23	110	5	0.38594	20760	140	16540	110	338100	2800		14.9342	0.309949	0.798193	0.00377305	0.38594
PR1_fibrous_24	110	5	0.36579	7801	83	6044	69	286900	5600		33.6888	0.750367	0.776201	0.00604538	0.36579
PR1_fibrous_25	110	5	0.20075	18150	160	14360	140	519100	5100		26.2393	0.570525	0.792643	0.0051996	0.20075
PR1_fibrous_26	110	5	-0.020872	8971	85	7178	81	256900	3600		26.3224	0.568321	0.801609	0.00589491	-0.020872
PR1_fibrous_27	110	5	0.31721	22600	160	18150	130	579600	5700		23.4488	0.479807	0.804578	0.00404396	0.31721
PR1_fibrous_28	110	5	0.49097	14990	120	12050	100	291800	2600		18.0241	0.374217	0.805351	0.00463455	0.49097
PR1_fibrous_29	110	5	0.056325	47780	440	38830	380	312500	5400		5.96033	0.124458	0.814181	0.00546033	0.056325
PR1_fibrous_30	110	5	0.53032	6795	72	5371	58	256300	2000		34.6329	0.719685	0.791891	0.00597926	0.53032
PR1_V2_1	110	5	0.097276	114800	3200	95200	2300	59350	590		0.472017	0.0124609	0.830797	0.0152948	0.097276
PR1_V2_2	110	5	0.083252	45520	840	37850	780	64300	1300		1.27375	0.0355065	0.833035	0.0115007	0.083252
PR1_V2_3	110	5	0.20514	56270	890	45450	710	44730	760		0.733816	0.0160589	0.809202	0.00897796	0.20514
PR1_V2_4	110	5	0.29534	6469	71	5232	67	14800	230		2.11811	0.0472501	0.810271	0.00682029	0.29534
PR1_V2_5	110	5	-0.075891	8440	140	6870	120	24790	540		2.72557	0.0611485	0.815481	0.00980379	-0.075891
PR1_V2_6	110	5	0.3154	8596	94	7026	82	76040	880		8.1431	0.179938	0.818863	0.0065362	0.3154
PR1_V2_7	110	5	-0.16537	24380	360	19740	360	39300	900		1.48309	0.0374055	0.811172	0.00949979	-0.16537
PR1_V2_8	110	5	0.39287	19450	250	15900	220	52050	690		2.47116	0.0537737	0.818988	0.00771924	0.39287
PR1_V2_9	110	5	0.17844	9550	160	7740	130	15960	320		1.52995	0.0390397	0.811965	0.00961353	0.17844
PR1_V2_10	110	5	0.074139	63400	1200	51320	980	66030	630		0.96748	0.0229147	0.810956	0.0108819	0.074139
PR1_V2_11	110	5	-0.046586	45300	1400	36800	1100	46800	1700		0.859192	0.03224	0.813859	0.017464	-0.046586
PR1_V2_12	110	5	0.038379	79860	720	64510	610	57200	1100		0.658375	0.0158141	0.809278	0.00527694	0.038379
PR1_V2_13	110	5	-0.085048	211500	3300	170200	2700	22680	810		0.0948588	0.00252511	0.806211	0.00895299	-0.085048
PR1_V2_14	110	5	0.061548	149800	1600	121200	1300	62140	870		0.382704	0.00788885	0.81057	0.00612353	0.061548
PR1_V2_15	110	5	-0.013928	191000	1300	154900	1200	53300	1100		0.252723	0.00557457	0.81249	0.00418155	-0.013928
PR1_V2_16	110	5	0.17426	177100	1100	143630	860	74950	870		0.390001	0.00801023	0.812506	0.00349841	0.17426
PR1_V2_17	110	5	-0.060212	118300	1000	95930	990	99960	740		0.774109	0.0161767	0.812399	0.00540876	-0.060212
PR1_V2_18	110	5	0.093382	142500	1100	115590	850	59700	740		0.385599	0.00828863	0.812653	0.00432399	0.093382
PR1_V2_19	110	5	0.11741	114660	880	92470	700	77510	660		0.623276	0.0130019	0.807958	0.00434689	0.11741
PR1_V2_20	110	5	0.21144	34140	180	27380	150	98100	1200		2.63956	0.0548449	0.80347	0.00304893	0.21144
PR1_V2_21	110	5	0.3585	13780	170	11200	140	43340	450		2.90512	0.0632881	0.81427	0.00713719	0.3585
PR1_V2_22	110	5	0.15932	97760	730	79680	610	59790	480		0.564471	0.0116123	0.81656	0.00435824	0.15932
PR1_V2_23	110	5	0.13815	123670	720	100190	600	42410	450		0.315487	0.00672076	0.811633	0.00338321	0.13815
PR1_V2_24	110	5	0.099459	47350	340	38120	300	27790	540		0.537785	0.0128059	0.806553	0.00428837	0.099459
PR1_V2_25	110	5	0.28993	11900	110	9604	85	27700	470		2.14989	0.0476588	0.808546	0.00516418	0.28993
PR1_V2_26	110	5	0.26338	83990	820	67920	650	97600	1000		1.06316	0.0217715	0.810158	0.00552776	0.26338
PR1_V2_27	110	5	0.39656	9224	90	7377	72	64890	850		6.49671	0.141399	0.801236	0.00551866	0.39656
PR1_V2_28	110	5	0.14371	114500	1200	92610	990	96500	900		0.773497	0.0159923	0.810312	0.0060542	0.14371
PR1_V2_29	110	5	0.014797	33600	1500	27200	1200	28350	330		0.774799	0.0247167	0.811016	0.0254046	0.014797
PR1_V2_30	110	5	-0.057234	45800	1100	36990	900	74410	660		1.49551	0.0364026	0.809131	0.0138059	-0.057234
PR1_V2_31	110	5	0.41429	77900	1100	63710	800	112090	710		1.3259	0.0280898	0.819351	0.00772709	0.41429
PR1_V2_32	110	5	0.60097	71710	390	57920	290	125500	1300		1.60801	0.0332216	0.809186	0.0029854	0.60097
PR1_V2_33	110	5	0.30988	39420	760	31780	610	57900	1500		1.35415	0.0283251	0.807676	0.0109663	0.30988	misplaced spot
PR1_V2_34	110	5	0.17052	106500	1700	86200	1400	143700	2000		1.24997	0.0257775	0.810882	0.00921585	0.17052
PR1_V2_35	110	5	0.54603	35420	270	28650	200	75920	880		1.96005	0.0425354	0.810356	0.00418033	0.54603
PR1_V2_36	110	5	0.40798	20680	210	16730	170	55400	440		2.46909	0.0519957	0.810485	0.00581087	0.40798
PR1_V2_37	110	5	0.042305	37960	300	30850	280	95000	1300		2.26287	0.0499341	0.814196	0.00489031	0.042305	misplaced spot
PR1_V2_38	110	5	0.23094	59140	630	47830	510	148500	2400		2.28644	0.0486172	0.81025	0.00609493	0.23094
PR1_V2_39	110	5	0.46937	7780	210	6330	160	34510	440		4.11803	0.0993408	0.815124	0.0150437	0.46937
PR1_V2_40	110	5	0.25847	73940	460	60170	390	72150	600		0.893325	0.0183992	0.815268	0.00365552	0.25847
PR1_V2_41	110	5	0.3636	9350	180	7600	140	24900	480		2.46308	0.0653593	0.814332	0.0108289	0.3636
PR2_V1_A_1	110	5	0.1765	63890	290	46680	240	197000	1900		2.80563	0.0581507	0.731977	0.00250546	0.1765
PR2_V1_A_2	110	5	0.027463	42400	1000	30690	750	249100	6100		5.0889	0.16044	0.725155	0.0122914	0.027463
PR2_V1_A_3	110	5	-0.080679	30540	260	22320	260	217400	2200		6.46736	0.140044	0.732192	0.00527237	-0.080679
PR2_V1_A_4	110	5	0.38371	14590	120	10330	110	288900	4200		17.9385	0.375021	0.709324	0.00476324	0.38371
PR2_V1_A_5	110	5	0.30048	21590	170	15680	130	149800	1600		6.29379	0.133499	0.727601	0.00415206	0.30048
PR2_V1_A_6	110	5	0.22201	63190	420	45950	310	207300	1800		2.98603	0.0609271	0.728512	0.00344338	0.22201
PR2_V1_A_7	110	5	0.22212	99370	940	75060	710	173700	1600		1.57666	0.0322877	0.756751	0.00505242	0.22212
PR2_V1_A_8	110	5	0.23129	72930	380	53270	310	179900	1600		2.23708	0.0455138	0.731773	0.00285275	0.23129
PR2_V1_A_9	110	5	0.22887	55110	300	40150	230	215400	1900		3.55597	0.0742867	0.729886	0.00287865	0.22887
PR2_V1_A_10	110	5	0.091165	18430	170	13560	150	265900	2700		13.118	0.286452	0.737113	0.00529861	0.091165
PR2_V1_A_11	110	5	0.19212	49900	300	36360	230	226100	2100		4.09561	0.0836054	0.73	0.00317944	0.19212
PR2_V1_A_12	110	5	0.49924	11127	84	7747	71	510000	2100		42.0367	0.862854	0.697518	0.00413344	0.49924
PR2_V1_A_13	110	5	0.47196	32750	390	23750	270	474100	2300		13.1777	0.280918	0.726528	0.00596963	0.47196
PR2_V1_A_14	110	5	0.43249	14770	120	10430	100	408700	1900		25.1836	0.515678	0.707463	0.00443722	0.43249
PR2_V1_A_15	110	5	0.40904	22300	300	15740	180	716000	11000		29.031	0.699967	0.707131	0.00623131	0.40904
PR2_V1_A_16	110	5	0.21105	24090	210	17360	170	479400	7000		18.214	0.416575	0.721959	0.00472394	0.21105
PR2_V1_A_17	110	5	0.18886	51600	1100	37460	790	499500	4000		8.83379	0.202697	0.727307	0.0108847	0.18886
PR2_V1_A_18	110	5	0.24324	11214	99	5506	58	2667000	43000		215.989	4.58703	0.491898	0.00337415	0.24324
PR2_V1_A_19	110	5	0.027337	12210	120	7270	92	1622000	10000		120.921	2.50217	0.596511	0.00477012	0.027337
PR2_V1_A_20	110	5	-0.45153	25310	360	15580	330	2947000	71000		103.691	2.61903	0.616702	0.00785268	-0.45153
PR2_V1_A_21	110	5	0.0041051	11880	110	6655	74	2071000	20000		159.187	3.28233	0.561218	0.00405289	0.0041051
PR2_V1_A_22	110	5	-0.040782	7100	130	3713	98	1529000	11000		193.951	4.61039	0.523922	0.00839946	-0.040782
PR2_V1_A_23	110	5	0.26935	28170	200	19640	160	1164300	6400		38.048	0.784495	0.698481	0.00376702	0.26935
PR2_V1_A_24	110	5	-0.045724	11140	110	6255	92	1823000	23000		150.419	3.23841	0.562525	0.0049735	-0.045724
PR2_V1_A_25	110	5	0.30073	10710	170	4618	73	3286000	67000		279.27	5.831	0.431981	0.00482965	0.30073
PR2_V1_A_26	110	5	0.35273	9901	90	5386	67	1866000	11000		170.795	3.52817	0.544988	0.00419057	0.35273
PR2_V1_A_27	110	5	-0.035871	45840	780	32900	570	630000	13000		12.2903	0.327265	0.719037	0.00871437	-0.035871
PR2_V1_A_28	110	5	-0.24636	24790	240	15520	200	2545000	65000		91.2	2.42725	0.627213	0.00504543	-0.24636
PR2_V1_A_29	110	5	0.16526	51220	360	35990	270	1533000	21000		27.0641	0.597074	0.70395	0.00361169	0.16526
PR2_V1_A_30	110	5	0.81473	71410	570	50880	410	1819000	11000		23.2566	0.474751	0.713819	0.00404072	0.81473
PR2_V1_A_31	110	5	0.63977	25140	370	17160	240	1118000	10000		40.6137	0.85556	0.683836	0.00692922	0.63977
PR2_V1_B_1	110	5	-0.0221	51650	470	36490	380	787700	8900		13.7603	0.27922	0.707788	0.00488514	-0.0221
PR2_V1_B_2	110	5	0.094104	25410	340	17600	260	929300	6000		33.1485	0.697671	0.693917	0.00690275	0.094104
PR2_V1_B_3	110	5	0.010196	42540	230	29750	210	891900	7300		19.0017	0.393301	0.700631	0.00310911	0.010196
PR2_V1_B_4	110	5	0.40765	16330	140	11190	100	825000	5400		45.7355	0.93325	0.686505	0.00424299	0.40765
PR2_V1_B_5	110	5	0.33228	29120	220	20190	160	1244000	12000		38.8132	0.794106	0.694616	0.00379564	0.33228
PR2_V1_B_6	110	5	0.69428	14480	140	10102	97	850200	7300		52.7624	1.10594	0.698938	0.00475325	0.69428
PR2_V1_B_7	110	5	0.11747	10137	94	6782	84	867000	9000		77.306	1.60816	0.670267	0.00517577	0.11747
PR2_V1_B_8	110	5	0.030286	17680	210	12460	180	1054000	6600		54.2518	1.15537	0.70605	0.00659024	0.030286
PR2_V1_B_9	110	5	0.57948	9130	110	6205	83	914100	5900		90.8601	1.90191	0.68088	0.00611745	0.57948
PR2_V1_B_10	110	5	0.61493	13240	140	9260	100	1020000	11000		69.9393	1.4455	0.700685	0.00528531	0.61493
PR2_V1_B_11	110	5	0.03155	28600	200	20540	170	1260000	15000		40.1358	0.850504	0.719506	0.00389085	0.03155
PR2_V1_B_12	110	5	0.26432	9080	150	6360	110	852400	5200		85.0921	1.86691	0.701732	0.00837636	0.26432
PR2_V1_B_13	110	5	0.25415	53410	270	39430	210	871800	8200		14.7761	0.30868	0.739612	0.00271051	0.25415
PR2_V1_B_14	110	5	0.22151	49660	260	36510	200	766700	4000		14.011	0.286518	0.736554	0.00278551	0.22151
PR2_V1_B_15	110	5	0.39171	17100	130	11980	100	1052800	7600		55.9484	1.15125	0.701876	0.00395492	0.39171
PR2_V1_B_16	110	5	0.11069	64300	550	47560	440	789500	9500		11.1643	0.227496	0.741021	0.00465977	0.11069
PR2_V1_B_17	110	5	0.084856	32410	360	23270	270	995100	17000		27.5204	0.577688	0.719312	0.00576639	0.084856
PR2_V1_B_18	110	5	0.20396	26400	220	18280	170	1779000	16000		61.0743	1.25792	0.693701	0.00432322	0.20396
PR2_V1_B_19	110	5	0.46942	44990	490	31740	330	1283000	13000		25.8857	0.527181	0.70679	0.00531133	0.46942
PR2_V1_B_20	110	5	0.69607	10600	110	7168	70	921200	3900		79.2422	1.65121	0.677473	0.00481805	0.69607
PR2_V1_B_21	110	5	0.31403	13300	110	9112	94	1114000	13000		76.2558	1.59332	0.686376	0.00452933	0.31403
PR2_V1_B_22	110	5	0.32536	12040	170	8250	120	928000	15000		69.2859	1.43767	0.686479	0.00694517	0.32536
PR2_V1_B_23	110	5	0.41255	23230	170	16180	110	1046000	13000		40.6208	0.874274	0.697797	0.00347864	0.41255
PR2_V1_B_24	110	5	0.5197	28710	250	20790	160	927400	4700		29.4415	0.61221	0.725473	0.0042077	0.5197
PR2_V1_B_25	110	5	0.22011	21260	140	15510	120	715000	10000		30.4391	0.657545	0.730884	0.00370604	0.22011
PR2_V1_B_26	110	5	0.65255	40180	300	29030	200	1378000	11000		31.0228	0.640725	0.72383	0.00367004	0.65255
PR2_V1_B_27	110	5	0.29079	34000	180	25130	150	706600	6100		18.9683	0.390634	0.74048	0.00294852	0.29079
PR2_V1_B_28	110	5	0.012793	19640	160	14030	150	704500	7800		32.3976	0.683831	0.715675	0.00480102	0.012793
PR2_V1_B_29	110	5	0.071625	11888	95	8135	89	1084700	5100		82.8743	1.69397	0.685565	0.00463552	0.071625
PR2_V1_B_30	110	5	0.55733	14100	120	9480	100	1171800	8400		75.5419	1.55359	0.67358	0.00455634	0.55733
PR2_V1_C_1	110	5	0.22946	15850	140	11980	110	53100	1200		3.0277	0.0701635	0.757229	0.00481496	0.22946
PR2_V1_C_2	110	5	0.62768	24340	260	18520	180	63380	800		2.35799	0.0490648	0.76229	0.00549433	0.62768
PR2_V1_C_3	110	5	0.45383	8130	110	6171	92	48160	420		5.42108	0.115921	0.76044	0.00764077	0.45383
PR2_V1_C_4	110	5	0.26909	63180	300	47680	210	18670	350		0.26995	0.006074	0.75606	0.00244381	0.26909
PR2_V1_C_5	110	5	0.12784	28930	860	21990	660	66320	660		2.10779	0.050032	0.761512	0.0160548	0.12784
PR2_V1_C_6	110	5	0.14579	76870	310	58500	240	3990	110		0.0473165	0.0011501	0.762428	0.002189	0.14579
PR2_V1_C_7	110	5	-0.012146	57200	1000	43190	740	30640	890		0.487865	0.0109657	0.756462	0.0092415	-0.012146
PR2_V1_C_8	110	5	0.35174	39860	240	30390	180	57980	520		1.33244	0.027596	0.763824	0.0032197	0.35174
PR2_V1_C_9	110	5	0.36026	32040	260	24430	210	51500	510		1.46795	0.0301175	0.76389	0.00450676	0.36026
PR2_V1_C_10	110	5	0.19615	31170	190	23660	160	41260	450		1.20287	0.0248799	0.760462	0.00345535	0.19615
PR2_V1_C_11	110	5	0.27099	33590	250	25270	180	35920	360		0.977557	0.0205834	0.753694	0.00387515	0.27099
PR2_V1_C_12	110	5	0.25268	6130	130	4590	110	37670	370		5.5847	0.125368	0.750157	0.0119808	0.25268
PR2_V1_C_13	110	5	0.0573	13520	240	10200	190	44700	920		2.98711	0.0699634	0.755828	0.00970631	0.0573
PR2_V1_C_14	110	5	0.26903	26090	320	19750	250	57340	830		2.00884	0.0414905	0.75839	0.0066713	0.26903
PR2_V1_C_15	110	5	0.50978	4873	64	3688	51	40710	460		7.6425	0.166058	0.758218	0.00721688	0.50978
PR2_V1_C_16	110	5	0.4112	9107	96	6932	77	69590	700		6.96189	0.149345	0.762576	0.00582814	0.4112
PR2_V1_C_17	110	5	0.44393	7390	76	5622	67	63880	610		7.85434	0.165441	0.76216	0.00598768	0.44393
PR2_V1_C_18	110	5	0.44687	7757	87	5950	74	55480	540		6.53915	0.137725	0.768463	0.00642297	0.44687
PR2_V1_C_19	110	5	0.42102	3255	52	2445	46	46570	560		13.0698	0.292943	0.752537	0.00926979	0.42102
PR2_V1_C_20	110	5	0.15785	20540	230	15460	190	48100	1300		2.09166	0.0478277	0.754065	0.00625704	0.15785
PR2_V1_C_21	110	5	0.017379	50200	1000	37980	790	62700	1000		1.1328	0.0300363	0.757968	0.0108949	0.017379
PR2_V1_C_22	110	5	-0.061967	44580	300	33890	250	75400	1000		1.53911	0.0334714	0.761608	0.00379539	-0.061967
PR2_V1_C_23	110	5	0.59982	3344	55	2563	45	41330	600		11.2875	0.249304	0.76786	0.00921956	0.59982
PR2_V1_C_24	110	5	0.43781	3925	60	2969	52	28980	390		6.75293	0.152353	0.757827	0.00879247	0.43781
PR2_V1_C_25	110	5	0.28502	8435	82	6464	76	41360	450		4.50224	0.095831	0.767743	0.00584553	0.28502
PR2_V1_C_26	110	5	0.24783	6300	120	4790	78	19900	1000		2.50538	0.0906908	0.761719	0.00952658	0.24783
PR2_V1_C_27	110	5	0.35269	4545	60	3396	55	44600	610		8.90479	0.196644	0.748572	0.00780604	0.35269
PR2_V1_C_28	110	5	-0.038862	2295	56	1719	58	28310	400		11.3754	0.272212	0.7504	0.0155943	-0.038862
PR2_V1_C_29	110	5	0.57591	19570	220	14720	110	46940	500		2.18134	0.0462694	0.753558	0.00507673	0.57591
PR2_V1_C_30	110	5	0.17891	38750	580	29490	440	62930	640		1.48009	0.0340866	0.762435	0.00804186	0.17891
PR2_V2_1	163	7.4	0.22664	43400	1200	30750	820	108570	850		2.30707	0.0524563	0.709831	0.0136086	0.22664
PR2_V2_2	163	7.4	-0.10109	496600	7500	351800	5400	84800	6600		0.11804	0.00667823	0.709723	0.00762744	-0.10109
PR2_V2_3	163	7.4	0.11681	129400	2400	91400	1700	33200	430		0.237505	0.00513172	0.707639	0.00927657	0.11681
PR2_V2_4	163	7.4	0.39351	27470	230	19260	170	140200	1300		4.68472	0.0952237	0.702421	0.00426497	0.39351
PR2_V2_5	163	7.4	0.068409	470800	6800	333100	4700	1970	110		0.00374993	0.000125033	0.708823	0.00714299	0.068409
PR2_V2_6	163	7.4	0.36813	19520	170	13790	160	49130	550		2.31304	0.0477622	0.707757	0.00512445	0.36813
PR2_V2_7	163	7.4	0.20501	41890	390	29710	270	82200	1000		1.79079	0.0407552	0.710546	0.00461369	0.20501
PR2_V2_8	163	7.4	0.013058	262400	1300	183760	900	206500	3500		0.719636	0.01607	0.701596	0.00243934	0.013058
PR2_V2_9	163	7.4	0.15665	175300	1200	123560	810	188000	1700		0.973555	0.0197924	0.706148	0.00334032	0.15665
PR2_V2_10	163	7.4	0.33839	16820	200	12030	150	56900	1000		3.1002	0.0646769	0.716538	0.00616147	0.33839
PR2_V2_11	163	7.4	0.35182	34120	280	23680	200	580300	4300		15.4653	0.312578	0.6953	0.00408645	0.35182
PR2_V2_12	163	7.4	0.22673	46860	720	32650	500	479600	2700		9.39077	0.195614	0.698041	0.00755746	0.22673
PR2_V2_13	163	7.4	0.31303	32310	400	22770	290	112500	2200		3.17165	0.0656986	0.706034	0.0062586	0.31303
PR2_V2_14	163	7.4	0.0093189	444200	3900	314200	2800	50180	560		0.103237	0.00224664	0.708643	0.00442441	0.0093189
PR2_V2_15	163	7.4	0.26891	93700	1200	66450	880	182400	1800		1.78199	0.0361093	0.710485	0.00653246	0.26891
PR2_V2_16	163	7.4	0.29722	132200	3800	93600	2600	161300	3400		1.12082	0.0233624	0.709323	0.0141508	0.29722
PR2_V2_17	163	7.4	0.38108	86430	850	59870	590	404600	3400		4.29988	0.0875411	0.693976	0.00482202	0.38108
PR2_V2_18	163	7.4	0.28652	82100	1000	56670	690	516000	3900		5.77874	0.119059	0.691528	0.0059439	0.28652
PR2_V2_19	163	7.4	-0.20907	278900	5800	193500	4100	471700	9200		1.54727	0.0431975	0.695076	0.010299	-0.20907
PR2_V2_20	163	7.4	0.48306	245200	1500	169890	930	799800	5400		2.97222	0.0608063	0.69414	0.00284389	0.48306
PR2_V2_21	163	7.4	0.39537	25170	210	17980	170	60510	730		2.21118	0.0456057	0.715659	0.00450385	0.39537
PR2_V2_22	163	7.4	0.059567	649200	5700	456200	3900	57800	2700		0.0754651	0.00262473	0.704006	0.00430568	0.059567
PR2_V2_23	163	7.4	0.21037	143800	1700	100100	1200	391100	6600		2.48562	0.0506666	0.697389	0.00586003	0.21037
PR2_V2_24	163	7.4	0.11729	145700	1200	101900	810	422500	7700		2.60567	0.056079	0.700671	0.0040027	0.11729
PR2_V2_25	163	7.4	0.1535	452000	2000	316700	1400	73500	1300		0.147978	0.00316419	0.701955	0.00219119	0.1535
PR2_V2_26	163	7.4	0.094971	263100	6200	183700	4300	202600	1000		0.7009	0.0166044	0.699501	0.0115956	0.094971
PR2_V2_27	163	7.4	-0.076129	626000	2400	443700	1500	5280	360		0.00674139	0.000304303	0.710092	0.00181148	-0.076129
PR2_V2_28	163	7.4	0.079142	516200	7400	365400	5200	2150	190		0.00359561	0.000164677	0.70917	0.00714933	0.079142
PR2_V2_29	163	7.4	0.25388	27530	250	19420	200	26340	600		0.8741	0.0192323	0.706713	0.00484284	0.25388
PR2_V2_30	163	7.4	0.046564	27750	480	19710	360	67500	900		2.22581	0.0551611	0.711579	0.00893361	0.046564

## Sheet: 2020-09-23
Raw Data											Final Data (WC-1 corrected)
	Crater Size	Pulse rate	ErrorCorrelation_38_6vs7_6	Pb206_CPS	Pb206_CPS_Int2SE	Pb207_CPS	Pb207_CPS_Int2SE	U238_CPS	U238_CPS_Int2SE		corr 238/206	1SE prop	ROM 207/206 corr	1SE	err corr
ASH15D_1	163	7.4	0.047521	2190	110	1161	74	2135000	27000		913.202	25.8001	0.53074	0.0215105	0.047521
ASH15D_2	163	7.4	0.10179	1577	71	911	49	1276000	15000		733.485	22.8583	0.578337	0.0202601	0.10179
ASH15D_3	163	7.4	0.1945	2343	79	1228	59	2559000	51000		1011.5	23.2883	0.524711	0.0153818	0.1945
ASH15D_4	163	7.4	0.1972	2347	90	1175	58	2634000	95000		1026.8	23.2069	0.501209	0.0156466	0.1972
ASH15D_5	163	7.4	-0.060653	2543	79	1625	82	1765300	8100		642.671	16.2987	0.639736	0.018933	-0.060653
ASH15D_6	163	7.4	0.17139	2451	76	927	48	3501000	30000		1309.96	30.4741	0.378643	0.0114134	0.17139
ASH15D_7	163	7.4	0.011461	2620	130	1730	110	1676000	22000		589.932	16.4455	0.661057	0.0266277	0.011461
ASH15D_8	163	7.4	0.014969	1512	53	844	80	1518000	21000		909.995	21.7386	0.558836	0.028206	0.014969
ASH15D_9	163	7.4	-0.1023	1996	64	1014	48	2017000	18000		915.498	21.9159	0.508594	0.0145228	-0.1023
ASH15D_10	163	7.4	-0.011442	1607	59	870	130	1658000	13000		929.09	25.785	0.541998	0.0416511	-0.011442
ASH15D_11	163	7.4	0.49477	1393	56	1039	44	502000	13000		326.992	8.05534	0.746721	0.0217761	0.49477
ASH15D_12	163	7.4	-0.47093	4040	150	2020	130	4551000	21000		1024.98	28.6221	0.500569	0.0185747	-0.47093
ASH15D_13	163	7.4	-0.074112	2392	68	1180	110	2747000	18000		1058.36	24.1537	0.493873	0.0240387	-0.074112
ASH15D_14	163	7.4	0.33772	3051	98	2272	80	1185000	7100		359.626	9.01789	0.745522	0.0177459	0.33772
ASH15D_15	163	7.4	0.2726	1216	64	750	53	1048000	13000		786.702	24.6868	0.617478	0.0271729	0.2726
ASH15D_16	163	7.4	0.05523	1949	51	1116	47	1620000	20000		759.048	19.2626	0.573253	0.0141954	0.05523
ASH15D_17	163	7.4	0.20508	1560	210	732	35	1342000	16000		795.095	53.2336	0.469765	0.0335159	0.20508
ASH15D_18	163	7.4	0.36988	1104	48	572	29	1019000	13000		857.554	22.9028	0.518706	0.0173022	0.36988
ASH15D_19	163	7.4	0.26014	1190	120	627	51	897000	23000		720.66	36.0594	0.52749	0.0341311	0.26014
ASH15D_20	163	7.4	0.033845	2076	54	710	34	3375000	21000		1508.82	33.7568	0.342393	0.00931889	0.033845
ASH15D_21	163	7.4	0.18551	2294	75	1053	57	2660000	45000		1093.96	25.0157	0.459546	0.0145139	0.18551
ASH15D_22	163	7.4	0.38651	1510	110	910	47	932000	14000		616.62	20.4255	0.603335	0.026908	0.38651
ASH15D_23	163	7.4	-0.14746	1239	45	673	45	1281000	33000		945.313	28.5331	0.543798	0.0206659	-0.14746
ASH15D_24	163	7.4	-0.065254	1484	48	640	100	2223000	16000		1395.27	36.0171	0.431758	0.0344071	-0.065254
ASH15D_25	163	7.4	0.37764	1086	32	393	20	1799000	15000		1536.11	36.7024	0.36229	0.0106402	0.37764
ASH15D_26	163	7.4	-0.0052784	1338	45	567	51	2024000	13000		1405.49	35.1604	0.424249	0.020347	-0.0052784
ASH15D_27	163	7.4	-0.0089576	2384	76	1734	76	956000	21000		358.198	10.3735	0.728177	0.01971	-0.0089576
ASH15D_28	163	7.4	0.050231	1733	48	1044	46	1511700	4900		795.874	18.7682	0.603109	0.0156762	0.050231
ASH15D_29	163	7.4	-0.021847	3100	230	2880	380	1640000	19000		482.041	18.1267	0.93009	0.0703156	-0.021847	outlier
ASH15D_30	163	7.4	0.13256	1018	40	524	36	1276000	19000		1115.66	28.1267	0.515321	0.0203693	0.13256
ASH15D_31	163	7.4	0.19582	1705	62	762	42	2204000	34000		1156.53	27.3078	0.44743	0.0147557	0.19582
C_WC1_1	110	5	0.35261	64750	420	7900	100	1557000	11000		22.3429	0.435838	0.122147	0.000867683	0.35261
C_WC1_2	110	5	0.33668	74640	430	9340	120	1797000	16000		22.2569	0.435293	0.125276	0.000880972	0.33668
C_WC1_3	110	5	0.20967	73640	480	9930	110	1744000	17000		21.7807	0.426571	0.134999	0.000866581	0.20967
C_WC1_4	110	5	0.20511	68880	290	8474	90	1665000	13000		22.0668	0.433415	0.123166	0.00070277	0.20511
C_WC1_5	110	5	0.039486	69200	370	7205	85	1723000	12000		22.6078	0.443891	0.104237	0.000674295	0.039486
C_WC1_6	110	5	0.099635	53750	560	7670	120	1265000	16000		21.4295	0.418523	0.14286	0.00134114	0.099635
C_WC1_7	110	5	-0.074367	81700	1100	14670	590	1757000	22000		19.4623	0.383966	0.179764	0.00380773	-0.074367
C_WC1_8	110	5	-0.24726	63360	420	5372	88	1579000	18000		22.5507	0.444379	0.0848819	0.000749147	-0.24726
C_WC1_9	110	5	0.068408	51090	400	3759	65	1312000	17000		23.2304	0.457721	0.0736598	0.0006983	0.068408
C_WC1_10	110	5	-0.099737	50920	310	4800	180	1271000	10000		22.6036	0.444388	0.0943728	0.00179062	-0.099737
C_WC1_11	110	5	0.34595	58480	300	4658	74	1508400	7700		23.3673	0.456857	0.0797418	0.000664863	0.34595
C_WC1_12	110	5	0.11779	58670	460	5710	120	1458000	11000		22.5229	0.44129	0.0974348	0.00109152	0.11779
C_WC1_13	110	5	0.14223	59220	300	5752	76	1456000	14000		22.3723	0.441185	0.0972399	0.000687222	0.14223
C_WC1_14	110	5	-0.0019725	50840	320	5020	140	1272400	9400		22.7102	0.445477	0.0988535	0.0014115	-0.0019725
C_WC1_15	110	5	0.2483	51510	210	4156	63	1301700	6600		23.0525	0.450514	0.0807752	0.000633262	0.2483
C_WC1_16	110	5	0.053627	62670	410	4582	88	1606000	15000		23.5789	0.460953	0.0731964	0.000741707	0.053627
C_WC1_17	110	5	0.094874	47550	360	3793	73	1217000	15000		23.3564	0.459498	0.0798595	0.000824871	0.094874
C_WC1_18	110	5	-0.023069	49770	450	4570	81	1268000	15000		23.4328	0.458029	0.0919269	0.000913507	-0.023069
C_WC1_19	110	5	0.030276	48470	260	5400	130	1180500	8900		22.5856	0.449467	0.111536	0.00137392	0.030276
C_WC1_20	110	5	0.10814	57710	550	5590	120	1460000	17000		23.4171	0.457633	0.0969739	0.00113754	0.10814
C_WC1_21	110	5	0.029797	55800	360	7350	110	1330000	10000		22.1317	0.433183	0.13187	0.00107335	0.029797
C_WC1_22	110	5	0.28831	55390	380	5244	90	1383400	8200		23.3767	0.459135	0.0947819	0.000874924	0.28831
C_WC1_23	110	5	-0.42251	49880	320	5380	140	1201600	5600		22.6422	0.443352	0.107982	0.00144539	-0.42251
C_WC1_24	110	5	0.16438	49870	420	4802	82	1249000	10000		23.2948	0.457994	0.0964	0.000916689	0.16438
C_WC1_25	110	5	0.20365	31220	550	4308	85	708000	15000		21.2516	0.420752	0.138146	0.00182497	0.20365
C_WC1_26	110	5	0.3214	53720	300	5612	79	1333000	13000		23.259	0.455697	0.104587	0.000791041	0.3214
C_WC1_27	110	5	0.24624	52280	300	4995	78	1329200	6400		23.8514	0.466648	0.095652	0.000794756	0.24624
C_WC1_28	110	5	-0.1972	49020	230	5459	90	1259400	6100		24.1621	0.472393	0.111489	0.000954445	-0.1972
C_WC1_29	110	5	0.42535	59020	300	5620	79	1509900	8100		23.9814	0.467901	0.0953303	0.000711676	0.42535
C_WC1_30	110	5	0.053803	67130	450	7920	94	1623000	15000		22.6384	0.44561	0.118114	0.000804087	0.053803
C_WC1_31	110	5	0.058931	57640	320	6003	72	1493000	15000		24.2076	0.475447	0.104265	0.000688229	0.058931
C_WC1_32	110	5	0.48232	53410	450	5556	72	1408000	16000		24.3721	0.481233	0.104144	0.000803966	0.48232
C_WC1_33	110	5	0.089968	56430	480	6237	78	1455000	17000		24.0145	0.469991	0.110652	0.000835835	0.089968
C_WC1_34	110	5	0.18649	51980	260	7500	120	1269600	9800		22.4509	0.448177	0.14445	0.00120938	0.18649
C_WC1_35	110	5	0.48934	48740	230	5437	61	1318000	10000		24.8196	0.489391	0.111678	0.000678868	0.48934
C_WC1_36	110	5	-0.1132	56550	400	6296	67	1525000	20000		24.7472	0.487917	0.111462	0.000711322	-0.1132
C_WC1_37	110	5	0.43906	58230	400	8352	90	1444000	16000		22.3347	0.440078	0.143594	0.000916464	0.43906
C_WC1_38	110	5	0.28407	46090	220	5207	69	1230400	8200		24.0652	0.471436	0.113103	0.000795616	0.28407
C_WC1_39	110	5	0.23978	51710	350	6067	83	1380000	12000		23.9511	0.467689	0.117461	0.000895406	0.23978
C_WC1_40	110	5	0.15298	59820	250	7173	75	1600300	8900		23.9435	0.469121	0.120046	0.000675101	0.15298
F8_A_1	163	7.4	0.18296	21540	260	15440	210	513100	2300		21.5642	0.440658	0.717622	0.00651748	0.18296
F8_A_2	163	7.4	0.45559	2124	52	1214	39	190000	1900		81.8605	1.77756	0.572214	0.0115429	0.45559
F8_A_3	163	7.4	0.4217	25500	190	19610	150	141600	1000		5.05296	0.099341	0.769895	0.00410592	0.4217
F8_A_4	163	7.4	0.22625	3546	87	1568	56	422500	2100		108.481	2.42983	0.442692	0.00957994	0.22625
F8_A_5	163	7.4	0.17618	24340	130	17820	120	423500	6100		15.7107	0.321069	0.732962	0.0031463	0.17618
F8_A_6	163	7.4	0.29292	1688	64	1202	53	115680	770		62.4419	1.70124	0.712896	0.0207048	0.29292
F8_A_7	163	7.4	0.26469	2458	74	1223	52	269300	3000		99.2944	2.25856	0.498125	0.0129608	0.26469
F8_A_8	163	7.4	0.08353	28950	190	22490	150	14950	510		0.461626	0.0117985	0.777741	0.00363461	0.08353
F8_A_9	163	7.4	0.59316	10010	140	3346	55	1500000	12000		136.365	2.76202	0.334646	0.00360713	0.59316
F8_A_10	163	7.4	0.16094	28080	200	21390	180	187600	4000		5.98983	0.127383	0.762619	0.00419906	0.16094
F8_A_11	163	7.4	0.020449	21970	200	17140	190	17350	300		0.713539	0.014986	0.781043	0.00559529	0.020449
F8_A_12	163	7.4	0.0045765	19570	150	15230	160	24420	330		1.14059	0.0231696	0.779118	0.00506025	0.0045765
F8_A_13	163	7.4	0.46198	2834	89	2037	71	126300	1700		40.5637	0.942666	0.71959	0.016861	0.46198
F8_A_14	163	7.4	0.33586	3530	74	1526	48	465500	5000		120.743	2.52305	0.432787	0.00817042	0.33586
F8_A_15	163	7.4	0.3315	3252	66	1478	52	395100	3400		110.784	2.33917	0.455007	0.00922993	0.3315
F8_A_16	163	7.4	0.45422	6650	140	5030	110	62760	780		8.66822	0.192464	0.757252	0.0114803	0.45422
F8_A_17	163	7.4	0.29224	4580	110	3319	89	76200	1200		15.2491	0.381491	0.725497	0.0130436	0.29224
F8_A_18	163	7.4	0.011037	11100	140	4450	100	1414000	12000		116.007	2.2896	0.401357	0.0051655	0.011037
F8_A_19	163	7.4	0.36683	19520	310	15040	220	53120	700		2.4495	0.0501134	0.771369	0.00831792	0.36683
F8_A_20	163	7.4	0.089878	3586	82	2770	140	119500	1900		30.5592	0.645638	0.773328	0.0214253	0.089878
F8_A_21	163	7.4	0.59843	3215	93	2392	69	100100	2000		28.4057	0.603995	0.744859	0.0151971	0.59843
F8_A_22	163	7.4	0.020228	3122	60	1567	57	328000	6200		93.4153	2.30478	0.502493	0.0103246	0.020228
F8_A_23	163	7.4	0.068037	2031	70	1533	51	26630	510		11.8825	0.290363	0.75566	0.0180784	0.068037
F8_A_24	163	7.4	-0.092254	29860	250	22660	240	238000	10000		6.682	0.191679	0.759739	0.00512274	-0.092254
F8_A_25	163	7.4	0.077948	31300	220	24360	170	14030	530		0.410722	0.0104696	0.779161	0.00385433	0.077948
F8_A_26	163	7.4	0.45178	1638	60	1230	46	15610	250		8.81809	0.223471	0.75177	0.0196548	0.45178
F8_A_27	163	7.4	0.42049	1775	75	1365	61	18070	290		9.38058	0.244166	0.769889	0.0236478	0.42049
F8_A_28	163	7.4	0.098372	23170	350	17460	290	230100	2200		8.98604	0.201156	0.754418	0.00845916	0.098372
F8_A_29	163	7.4	0.29801	1103	64	833	56	42560	510		35.3264	1.17374	0.756073	0.0335331	0.29801
F8_A_30	163	7.4	0.0033032	29470	230	23110	240	10380	190		0.318971	0.00680849	0.78508	0.00509362	0.0033032
F8_A_31	163	7.4	0.24265	2797	81	2253	70	33010	640		10.8405	0.236182	0.806423	0.0171063	0.24265
F8_A_32	163	7.4	0.17029	4798	65	3444	52	121800	4000		22.6222	0.534341	0.718616	0.00728045	0.17029
F8_A_33	163	7.4	0.017206	29370	230	22990	200	26320	420		0.824085	0.0177255	0.783663	0.00458116	0.017206
F8_A_34	163	7.4	0.033241	5410	110	3447	84	363500	5200		61.8048	1.25834	0.637879	0.0101108	0.033241
F8_A_35	163	7.4	0.16845	3278	83	1841	60	261400	2000		72.7579	1.8014	0.562262	0.0115894	0.16845
F8_A_36	163	7.4	0.32104	2644	59	1826	56	209100	1400		72.5998	1.60336	0.691406	0.0130967	0.32104
F8_A_37	163	7.4	-0.019198	17610	660	13680	500	111400	1600		5.6473	0.162186	0.777716	0.0203336	-0.019198
F8_A_38	163	7.4	0.0010786	10830	270	8140	220	106100	1100		9.09127	0.2063	0.752471	0.0138183	0.0010786
F8_A_39	163	7.4	0.39024	16710	140	12840	100	17730	460		0.950774	0.0218497	0.769277	0.00439486	0.39024
F8_A_40	163	7.4	0.38914	1444	61	1131	52	19600	270		12.4686	0.332219	0.784133	0.0244517	0.38914
F8_A_41	163	7.4	0.49723	4100	300	2980	170	37490	900		8.66918	0.293919	0.727657	0.033718	0.49723
G_NIST614_1	110	5	0.25925	191100	1800	165700	1500	272600	2200		1.32909	0.0258226	0.868072	0.0056638	0.25925
G_NIST614_2	110	5	0.23028	193000	1900	167700	1700	275800	2700		1.33083	0.025867	0.869901	0.00613917	0.23028
G_NIST614_3	110	5	0.43863	190000	2000	165200	1700	285900	3200		1.38899	0.0270265	0.870463	0.00639963	0.43863
G_NIST614_4	110	5	0.86222	186100	2100	162600	1700	283500	3400		1.39077	0.0271924	0.874718	0.00672035	0.86222
G_NIST614_5	110	5	0.92763	187800	2000	164000	1700	284900	3400		1.38336	0.0270633	0.874263	0.00648907	0.92763
G_NIST614_6	110	5	0.3629	182600	2000	159200	1700	276300	3300		1.37584	0.026811	0.872843	0.00666829	0.3629
G_NIST614_7	110	5	0.34434	182700	2200	159100	1900	273000	3200		1.35578	0.0264141	0.871818	0.00738428	0.34434
G_NIST614_8	110	5	0.5116	180700	1700	157700	1500	270800	2900		1.3598	0.0265062	0.873711	0.00583777	0.5116
G_NIST614_9	110	5	0.36179	179400	1900	155700	1700	265600	3000		1.34693	0.0261903	0.868881	0.00660082	0.36179
G_NIST614_10	110	5	0.33346	179100	1900	155500	1700	263600	3200		1.34244	0.0261723	0.869218	0.00661312	0.33346
G_NIST614_11	110	5	0.34237	175800	1600	152200	1400	257200	2700		1.34192	0.0261601	0.866742	0.00560145	0.34237
G_NIST614_12	110	5	0.26795	177500	1600	154700	1400	258700	2600		1.34392	0.0261493	0.872541	0.00556619	0.26795
G_NIST614_13	110	5	0.39146	176400	1700	153600	1500	257700	2700		1.35311	0.0263524	0.871739	0.0059734	0.39146
G_NIST614_14	110	5	0.27142	179000	1700	155600	1500	259900	2700		1.35214	0.026308	0.870263	0.00588172	0.27142
G_NIST614_15	110	5	0.30453	178200	1600	154300	1400	258500	2700		1.35634	0.026413	0.866867	0.0055264	0.30453
G_NIST614_16	110	5	0.35924	178000	1700	154500	1500	258000	2500		1.3586	0.0264445	0.868966	0.00591042	0.35924
G_NIST614_17	110	5	0.033986	175600	1600	152900	1400	255200	2300		1.36363	0.0265202	0.87172	0.00562378	0.033986
G_NIST614_18	110	5	0.26728	169200	1400	147200	1200	248400	2200		1.37569	0.0267575	0.870967	0.00505262	0.26728
G_NIST614_19	110	5	0.29617	166800	1400	144800	1200	245400	2000		1.37979	0.0268386	0.869094	0.00511973	0.29617
G_NIST614_20	110	5	0.32326	170000	1700	148000	1400	247100	2400		1.35561	0.0263981	0.871579	0.00599192	0.32326
G_NIST614_21	110	5	0.13148	173700	1700	151200	1500	254100	2400		1.36078	0.0264563	0.871457	0.00606529	0.13148
G_NIST614_22	110	5	0.88358	171800	1900	149300	1600	252600	2400		1.35909	0.026512	0.870023	0.00669152	0.88358
G_NIST614_23	110	5	0.83914	170400	2000	148600	1800	253800	2500		1.35922	0.026549	0.873058	0.00735443	0.83914
G_NIST614_24	110	5	0.29698	168900	2000	147000	1700	253600	2400		1.35157	0.0263354	0.871328	0.00720277	0.29698
G_NIST614_25	110	5	0.26882	168300	2100	146100	1800	254800	2500		1.34722	0.0262793	0.869081	0.0076111	0.26882
G_NIST614_26	110	5	0.29498	163700	1800	142500	1600	250400	2500		1.36337	0.0265218	0.871486	0.00684011	0.29498
JT_1	163	7.4	0.094333	3030	590	1487	87	447100	6500		138.67	12.7041	0.491318	0.0498904	0.094333
JT_2	163	7.4	0.034738	6890	360	4960	300	372900	4400		51.0229	1.71381	0.720703	0.0287691	0.034738
JT_3	163	7.4	0.016102	16700	1200	11530	860	663100	5100		38.1954	1.3909	0.691205	0.0357533	0.016102
JT_4	163	7.4	-0.34829	116000	6800	87700	5200	838000	19000		6.76493	0.274709	0.756895	0.0315187	-0.34829
JT_5	163	7.4	0.11996	2864	96	1348	71	651900	6300		211.338	5.01784	0.471206	0.0146924	0.11996
JT_6	163	7.4	0.1029	1860	130	939	67	273800	2500		136.957	5.21242	0.505413	0.0252118	0.1029
JT_7	163	7.4	-0.049063	2172	74	1081	60	517500	5600		219.268	5.13822	0.498264	0.0162067	-0.049063
JT_8	163	7.4	-0.1008	1990	150	778	61	471700	4900		209.153	8.69024	0.3914	0.0212605	-0.1008
JT_9	163	7.4	0.01775	2387	93	1134	86	644000	12000		245.072	5.63072	0.475614	0.0202525	0.01775
JT_10	163	7.4	0.079791	1927	82	940	65	457100	7100		216.529	5.53143	0.48836	0.0198032	0.079791
JT_11	163	7.4	0.19718	1980	120	946	62	455300	5700		210.603	7.53197	0.478322	0.0213247	0.19718
JT_12	163	7.4	0.054115	1674	60	904	59	346400	3100		190.759	4.75258	0.540639	0.020105	0.054115
JT_13	163	7.4	-0.48742	3640	140	1220	100	1186100	9100		300.216	7.51351	0.335546	0.0151733	-0.48742
JT_14	163	7.4	-0.097527	4090	150	1162	84	1425000	20000		321.347	7.41918	0.284431	0.0115149	-0.097527
JT_15	163	7.4	0.34647	940	48	524	38	154100	1400		151.345	5.03127	0.558081	0.0247209	0.34647
JT_16	163	7.4	0.2988	1538	64	761	50	359700	6900		217.784	5.37227	0.495362	0.0192407	0.2988
JT_17	163	7.4	0.039206	23200	2000	17400	1400	253800	8800		10.6115	0.465097	0.750854	0.0442204	0.039206
JT_18	163	7.4	-0.4035	22700	1900	17400	1400	273000	15000		12.564	0.438005	0.767392	0.044497	-0.4035
JT_19	163	7.4	-0.0049312	2063	90	964	64	489900	3400		223.65	6.26631	0.467813	0.0185606	-0.0049312
JT_20	163	7.4	-0.097636	2134	74	917	66	563600	3800		247.939	6.63638	0.430199	0.0171651	-0.097636
JT_21	163	7.4	0.18404	1609	68	903	55	273200	2200		161.191	4.35361	0.561857	0.0208028	0.18404
JT_22	163	7.4	0.032447	1381	58	551	45	441400	2900		301.203	8.55924	0.39944	0.0183206	0.032447
JT_23	163	7.4	0.058566	1341	65	520	42	403500	7600		282.377	7.4715	0.388212	0.0182635	0.058566
JT_24	163	7.4	0.4403	1020	77	807	64	64700	1900		60.3188	2.08383	0.792077	0.0433132	0.4403
JT_25	163	7.4	0.040064	3190	150	2230	260	400900	6800		115.511	3.41631	0.699855	0.0439418	0.040064
JT_26	163	7.4	-0.35474	2650	180	1060	110	655400	6900		235.631	8.00086	0.400455	0.0248054	-0.35474
JT_27	163	7.4	-0.062243	3470	510	2270	450	404300	5800		109.919	8.22498	0.654923	0.0807186	-0.062243
JT_28	163	7.4	-0.20853	1709	67	683	55	552900	5600		293.553	7.35333	0.400104	0.0178969	-0.20853
JT_29	163	7.4	0.049632	923	53	309	31	329200	5900		322.895	9.81584	0.335159	0.0193492	0.049632
JT_30	163	7.4	0.29081	1484	69	776	43	321900	8700		194.701	5.2114	0.523506	0.0189125	0.29081
JT_31	163	7.4	0.051634	1804	70	631	44	677000	18000		338.745	7.56496	0.350176	0.0139561	0.051634

## Sheet: 2019-09-26
Raw Data											Final Data (WC-1 corrected)
	Crater Size	Pulse rate	ErrorCorrelation_38_6vs7_6	Pb206_CPS	Pb206_CPS_Int2SE	Pb207_CPS	Pb207_CPS_Int2SE	U238_CPS	U238_CPS_Int2SE		corr 238/206	1SE prop	ROM 207/206 corr	1SE	err corr
ASH15D_1	163	7.4	0.29873	619	22	312	18	668500	3000		1041.91	28.0903	0.501842	0.0170771	0.29873
ASH15D_2	163	7.4	0.58346	1075	39	345	23	1558700	8300		1421.7	38.5628	0.319531	0.0121791	0.58346
ASH15D_3	163	7.4	0.2484	780	28	166	19	1472000	13000		1841.26	49.5936	0.211893	0.0127645	0.2484
ASH15D_4	163	7.4	0.41426	509	27	181	13	723000	21000		1398.43	42.2551	0.354049	0.0158754	0.41426
ASH15D_5	163	7.4	0.33946	690	27	250	16	864200	8200		1254.27	34.5359	0.36074	0.0135896	0.33946
ASH15D_6	163	7.4	0.39991	742	28	236	14	1108000	20000		1505.82	39.1789	0.316673	0.0111809	0.39991
ASH15D_7	163	7.4	0.5074	1068	32	418	17	1245000	12000		1172.18	28.7543	0.38968	0.00988548	0.5074
ASH15D_8	163	7.4	0.30377	863	27	341	17	1067200	6700		1243.53	31.6335	0.393411	0.0116282	0.30377
ASH15D_9	163	7.4	0.21541	604	29	223	19	829000	17000		1372.73	39.687	0.367596	0.0180539	0.21541
ASH15D_10	163	7.4	0.42013	902	29	382	17	1104100	7700		1197.66	30.7204	0.421657	0.0116254	0.42013
ASH15D_11	163	7.4	0.10037	1002	36	530	30	1024700	5200		994.269	26.5278	0.526637	0.017731	0.10037
ASH15D_12	163	7.4	0.34511	569	23	230	15	739000	18000		1223.37	35.2351	0.402456	0.0155075	0.34511
ASH15D_13	163	7.4	0.46965	653	21	203	13	977200	4400		1384.07	35.9046	0.309518	0.0111387	0.46965
ASH15D_14	163	7.4	0.33664	815	24	318	15	1090400	9400		1221.41	30.4972	0.388483	0.0108485	0.33664
ASH15D_15	163	7.4	0.52971	872	28	355	16	1107900	7600		1129.08	28.5172	0.405336	0.0112645	0.52971
ASH15D_16	163	7.4	0.21999	582	23	197	14	856000	24000		1244.51	37.3295	0.337013	0.0137621	0.21999
ASH15D_17	163	7.4	0.51627	758	24	302	17	1094600	6100		1216.79	31.7027	0.39668	0.0128659	0.51627
ASH15D_18	163	7.4	0.24218	548	24	197	16	886500	6000		1340.93	39.9338	0.357922	0.0165857	0.24218
ASH15D_19	163	7.4	0.46497	548	27	262	20	663400	9400		977.684	28.6504	0.476018	0.0217191	0.46497
ASH15D_20	163	7.4	0.29425	593	23	204	13	1077000	15000		1403.28	38.6709	0.342514	0.0128318	0.29425
ASH15D_21	163	7.4	0.38376	658	21	165	11	1453000	11000		1683.21	42.6914	0.249667	0.0092671	0.38376
ASH15D_22	163	7.4	0.31465	495	23	189	15	854500	7400		1274.39	38.0986	0.380154	0.0175572	0.31465
ASH15D_23	163	7.4	0.30713	590	24	168	15	1187000	15000		1487.82	40.3959	0.283505	0.013969	0.30713
ASH15D_24	163	7.4	0.35356	630	23	190	14	1408600	8900		1622.61	43.7474	0.300273	0.0124001	0.35356
ASH15D_25	163	7.4	0.28626	613	25	215	15	1228400	4900		1438.03	41.9097	0.349205	0.0141719	0.28626
ASH15D_26	163	7.4	0.46806	518	23	212	14	948000	10000		1303.64	38.8062	0.407483	0.0162841	0.46806
C_WC1_1	110	5	0.32616	33780	290	3594	62	844600	6800		23.8671	0.487423	0.105931	0.00102506	0.32616
C_WC1_2	110	5	0.32572	35360	340	4835	81	829000	10000		22.5705	0.461145	0.13614	0.00132061	0.32572
C_WC1_3	110	5	0.21706	34010	270	4265	62	837900	9200		24.281	0.497795	0.124858	0.00103856	0.21706
C_WC1_4	110	5	0.076408	28590	180	4315	59	681100	6200		23.4853	0.482505	0.150269	0.00113596	0.076408
C_WC1_5	110	5	0.18835	28720	180	3295	56	659200	6600		22.7952	0.46807	0.114228	0.00103911	0.18835
C_WC1_6	110	5	0.2908	34300	210	4454	64	806400	5700		23.4287	0.478637	0.129288	0.0010141	0.2908
C_WC1_7	110	5	0.085805	39140	200	4628	61	859500	5400		22.1026	0.452817	0.117727	0.000835764	0.085805
C_WC1_8	110	5	-0.11625	20180	220	3220	54	415900	6100		20.812	0.43322	0.158868	0.00159582	-0.11625
C_WC1_9	110	5	0.14135	35500	260	4465	79	777400	5600		22.0934	0.451792	0.125226	0.00120424	0.14135
C_WC1_10	110	5	-0.012752	33330	210	4002	56	757900	5500		22.9157	0.469098	0.119549	0.000921317	-0.012752
C_WC1_11	110	5	0.22734	31290	220	3769	49	746300	6500		23.7204	0.486186	0.119929	0.000890169	0.22734
C_WC1_12	110	5	-0.030053	37540	240	4412	67	892000	7500		23.6458	0.484613	0.117016	0.000968239	-0.030053
C_WC1_13	110	5	0.10265	33770	290	3677	52	808600	9700		23.51	0.48143	0.108409	0.000900745	0.10265
C_WC1_14	110	5	0.11956	33600	230	4804	80	719400	4400		21.0991	0.433982	0.142353	0.00128713	0.11956
C_WC1_15	110	5	0.24791	35770	240	4419	56	828500	6200		22.4033	0.457101	0.123001	0.000885724	0.24791
C_WC1_16	110	5	0.27356	24590	250	3665	59	607000	5700		23.9291	0.490038	0.148395	0.00141889	0.27356
C_WC1_17	110	5	0.20807	33570	220	3714	63	803200	6100		22.7081	0.464151	0.110152	0.00100593	0.20807
C_WC1_18	110	5	-0.21245	39090	410	4647	77	939400	9800		22.7997	0.467503	0.118361	0.00116564	-0.21245
C_WC1_19	110	5	0.17159	28370	280	3518	67	729500	8000		23.8409	0.487306	0.123464	0.00132997	0.17159
C_WC1_20	110	5	0.16252	32110	210	3678	62	822700	4800		23.7224	0.4864	0.114045	0.00103554	0.16252
C_WC1_21	110	5	-0.15162	35620	220	3736	57	879600	6500		22.2274	0.456717	0.104428	0.000863187	-0.15162
C_WC1_22	110	5	0.27036	31760	210	4517	66	773300	5700		21.8501	0.450274	0.141603	0.00114048	0.27036
C_WC1_23	110	5	0.14998	26650	210	2362	52	702800	6200		23.0499	0.471989	0.0882441	0.00103622	0.14998
C_WC1_24	110	5	0.19104	34860	180	5092	64	875100	4700		21.8661	0.445794	0.145433	0.000992403	0.19104
C_WC1_25	110	5	-0.52141	28380	250	3451	95	781800	5600		23.1562	0.476521	0.12107	0.00175732	-0.52141
C_WC1_26	110	5	0.01197	24600	190	2477	43	699000	7200		23.8909	0.489093	0.100252	0.000956582	0.01197
C_WC1_27	110	5	-0.022934	32900	200	4161	52	884700	8600		22.1078	0.454704	0.125923	0.000878812	-0.022934
C_WC1_28	110	5	0.0038248	29240	240	3645	68	788600	9000		21.9482	0.450744	0.124115	0.00127036	0.0038248
C_WC1_29	110	5	0.29212	33450	200	3974	54	898500	5700		21.2823	0.436542	0.118286	0.00088186	0.29212
C_WC1_30	110	5	-0.037988	34210	430	3257	75	946000	15000		21.8356	0.448878	0.0947911	0.00124884	-0.037988
C_WC1_31	110	5	0.12135	28380	220	3581	55	835400	9600		22.5824	0.464733	0.12563	0.00108542	0.12135
C_WC1_32	110	5	0.16497	27720	230	3599	59	851600	6900		23.5363	0.482421	0.129268	0.00119276	0.16497
C_WC1_33	110	5	0.090532	22010	150	1661	40	698300	4800		23.6165	0.48454	0.0751368	0.000944364	0.090532
C_WC1_34	110	5	-0.053483	22370	160	2332	51	674600	5600		22.5037	0.46428	0.103792	0.00119933	-0.053483
C_WC1_35	110	5	-0.31929	26720	260	2324	59	814300	4800		22.2716	0.457659	0.086597	0.00118236	-0.31929
C_WC1_36	110	5	0.12228	26030	320	2554	93	798200	5500		22.4284	0.468901	0.0976899	0.00188546	0.12228
C_WC1_37	110	5	0.13248	28630	230	2911	76	821300	5900		20.9383	0.432969	0.101233	0.00138869	0.13248
C_WC1_38	110	5	-0.18496	22050	230	1554	40	717500	8200		23.5503	0.483069	0.070169	0.000978675	-0.18496
C_WC1_39	110	5	0.09945	14460	190	1597	38	446500	7700		22.225	0.45907	0.109961	0.001501	0.09945
C_WC1_40	110	5	0.13338	21740	430	2220	75	731000	13000		24.2387	0.513147	0.101671	0.00199881	0.13338
C_WC1_41	110	5	0.23474	22520	230	2318	55	725700	6200		22.9384	0.472351	0.102482	0.00132946	0.23474
C_WC1_42	110	5	0.23281	28940	360	2236	49	978000	12000		24.0154	0.496381	0.0769265	0.000973465	0.23281
DA1_A_1	163	7.4	0.48877	1211	45	479	28	119200	1300		76.1696	2.07707	0.393817	0.0136988	0.48877
DA1_A_2	163	7.4	0.19252	1523	44	674	37	135000	1100		70.2556	1.79159	0.440619	0.0137265	0.19252
DA1_A_3	163	7.4	0.44043	8180	160	6250	130	37080	790		3.57789	0.087565	0.760728	0.0109078	0.44043
DA1_A_4	163	7.4	0.25473	4180	200	3070	190	90800	1500		16.8307	0.593211	0.731249	0.0287272	0.25473
DA1_A_5	163	7.4	0.46901	1011	47	427	32	101200	1200		78.5997	2.43526	0.420513	0.0186236	0.46901
DA1_A_6	163	7.4	0.49801	2940	250	1620	140	157500	1900		41.6014	1.95897	0.548619	0.0334029	0.49801
DA1_A_7	163	7.4	0.39751	4050	190	2800	180	166100	1400		32.022	0.968472	0.688345	0.0275104	0.39751
DA1_A_8	163	7.4	0.35656	2980	200	1610	160	216300	1900		56.8101	2.18496	0.537914	0.0323941	0.35656
DA1_A_9	163	7.4	0.27024	4830	380	3230	300	150800	1100		24.2931	1.09904	0.665822	0.0407001	0.27024
DA1_A_10	163	7.4	0.39164	16280	640	12420	450	67310	750		3.2339	0.0907364	0.759574	0.0203931	0.39164
DA1_A_11	163	7.4	0.44899	4530	320	2920	160	175400	1300		30.0498	1.20727	0.641782	0.0288135	0.44899
DA1_A_12	163	7.4	0.15071	24180	360	18900	330	65420	770		2.10828	0.0463944	0.778231	0.00896778	0.15071
DA1_A_13	163	7.4	0.27407	6260	230	4470	190	136000	1300		16.9603	0.440562	0.710945	0.0200593	0.27407
DA1_A_14	163	7.4	-0.076786	89900	1100	70090	880	69040	710		0.592843	0.0131317	0.776246	0.00683413	-0.076786
DA1_A_15	163	7.4	0.36563	186000	30000	161000	26000	99000	23000		0.209537	0.0398666	0.861819	0.0987816	0.36563
DA1_A_16	163	7.4	0.1364	60600	1100	47450	940	64380	840		0.81789	0.0171626	0.77959	0.0105192	0.1364
DA1_A_17	163	7.4	0.24801	1757	59	482	33	223300	1800		98.9516	2.50735	0.273136	0.0104598	0.24801
DA1_A_18	163	7.4	0.041654	533	30	346	23	2690	140		3.8082	0.160288	0.646326	0.0282715	0.041654
DA1_A_19	163	7.4	0.18278	913	38	722	37	2990	120		2.45184	0.0825925	0.787353	0.0261039	0.18278
DA1_A_20	163	7.4	0.17365	1013	42	762	37	6000	540		4.38408	0.163048	0.748942	0.0240144	0.17365
DA1_A_21	163	7.4	0.34804	617	24	419	25	8250	210		10.0899	0.312898	0.676132	0.0241843	0.34804
DA1_A_22	163	7.4	-0.16914	1770	160	1010	130	94670	930		40.3217	1.97003	0.568134	0.0448749	-0.16914
DA1_A_23	163	7.4	0.39204	570	47	469	42	1950	130		2.50626	0.140055	0.819221	0.0500809	0.39204
DA1_A_24	163	7.4	0.4402	670	27	346	24	43200	1000		47.6865	1.49217	0.514167	0.0207137	0.4402
DA1_A_25	163	7.4	0.48224	766	34	362	24	48470	650		48.425	1.4833	0.470525	0.0188526	0.48224
DA1_A_26	163	7.4	0.69504	689	39	428	29	13910	380		15.4608	0.52508	0.618483	0.0274222	0.69504
DA1_A_27	163	7.4	0.33113	475	25	319	30	16650	340		26.2224	0.93073	0.668652	0.036188	0.33113
DA1_A_28	163	7.4	0.1214	1909	54	194	23	333800	2300		132.82	3.25569	0.101181	0.00619319	0.1214
DA1_A_29	163	7.4	0.14414	902	42	510	37	40600	2300		33.7035	1.37303	0.562946	0.0243709	0.14414
DA1_A_30	163	7.4	0.57074	594	21	400	18	2960	120		3.58971	0.124744	0.670466	0.0192682	0.57074
DA1_A_31	163	7.4	0.39439	550	23	394	21	2580	120		3.4878	0.125542	0.713241	0.0242656	0.39439
DA1_A_32	163	7.4	0.56208	661	28	538	26	3690	130		4.17398	0.142243	0.810371	0.0261529	0.56208
DA1_A_33	163	7.4	0.33284	631	32	416	23	3720	300		4.01584	0.227386	0.656397	0.0247307	0.33284
DA1_A_34	163	7.4	0.3807	986	42	783	39	3110	130		2.35505	0.0872027	0.790656	0.0260227	0.3807
DA1_A_35	163	7.4	0.69037	439	23	243	14	12040	230		20.8149	0.70934	0.551118	0.0215525	0.69037
DA1_A_36	163	7.4	0.53697	408	23	282	19	4290	140		7.66975	0.296141	0.688164	0.0303594	0.53697
DA1_A_37	163	7.4	-0.032096	1879	64	486	41	246600	3100		100.046	2.44959	0.257521	0.0117657	-0.032096
DA1_A_38	163	7.4	0.49153	638	27	442	21	3350	130		4.04548	0.129598	0.68977	0.0220398	0.49153
DA1_A_39	163	7.4	0.072211	740	28	560	28	4990	140		5.06064	0.165728	0.753458	0.0237256	0.072211
DA1_A_40	163	7.4	0.19586	1061	45	394	27	110440	950		78.7476	2.31537	0.369729	0.0149637	0.19586
DA1_C_1	163	7.4	-0.33762	46290	610	30240	450	1757000	24000		28.6058	0.622248	0.650425	0.00649257	-0.33762
DA1_C_2	163	7.4	-0.35548	39320	770	24030	600	1879100	5400		35.7779	0.812582	0.608476	0.00969639	-0.35548
DA1_C_3	163	7.4	0.3351	1247	57	605	38	86900	1700		52.2927	1.36839	0.48305	0.0188442	0.3351
DA1_C_4	163	7.4	0.38383	661	25	349	20	35240	450		39.6134	1.11831	0.525687	0.0181264	0.38383
DA1_C_5	163	7.4	0.52785	807	27	494	25	21560	350		19.9797	0.54833	0.609476	0.0185685	0.52785
DA1_C_6	163	7.4	0.34894	614	26	302	19	38410	450		46.7401	1.34732	0.489713	0.0186505	0.34894
DA1_C_7	163	7.4	0.59374	778	28	311	15	72330	650		68.5298	1.8062	0.398001	0.0120281	0.59374
DA1_C_8	163	7.4	0.578	789	26	367	16	52180	780		49.5277	1.29323	0.463118	0.01271	0.578
DA1_C_9	163	7.4	0.073116	7500	130	577	38	1332900	5900		132.444	2.87274	0.076598	0.00261961	0.073116
DA1_C_10	163	7.4	-0.127	7260	160	544	38	1262000	7400		130.384	2.91271	0.0746045	0.00274424	-0.127
DA1_C_11	163	7.4	0.53175	556	20	287	14	30070	340		40.6331	1.11299	0.513937	0.0156428	0.53175
DA1_C_12	163	7.4	0.35555	1867	62	1203	48	53930	790		21.9009	0.608547	0.641541	0.0167246	0.35555
DA1_C_13	163	7.4	0.55707	857	45	480	29	44320	800		38.4822	1.19959	0.557652	0.0224166	0.55707
DA1_C_14	163	7.4	-0.14086	2387	49	463	32	344000	1700		106.905	2.40892	0.193122	0.00699238	-0.14086
DA1_C_15	163	7.4	0.1245	7900	110	565	23	1382000	17000		130.003	2.68473	0.0712073	0.0015385	0.1245
DA1_C_16	163	7.4	0.25497	4121	55	664	22	627100	3600		112.24	2.36763	0.160424	0.00287767	0.25497
DA1_C_17	163	7.4	0.23303	2018	38	396	15	292400	2900		105.448	2.30842	0.195379	0.00415046	0.23303
DA1_C_18	163	7.4	0.56272	579	22	368	16	10530	190		13.7625	0.39484	0.632808	0.0183497	0.56272
DA1_C_19	163	7.4	0.40598	470	19	99.1	8.7	64860	670		100.85	2.84494	0.209932	0.0101894	0.40598
DA1_C_20	163	7.4	0.050661	2762	62	367	18	413300	7900		110.883	2.44766	0.132296	0.00358358	0.050661
DA1_C_21	163	7.4	0.44261	770	24	360	18	48930	550		46.6091	1.20144	0.465495	0.0137734	0.44261
DA1_C_22	163	7.4	0.060969	465	21	108	12	65030	650		102.724	3.08245	0.231246	0.0139283	0.060969
DA1_C_23	163	7.4	0.39023	485	17	91.5	7.4	71850	740		109.493	2.9434	0.187837	0.00831456	0.39023
DA1_C_24	163	7.4	0.28843	1084	27	80.3	7.2	183000	2200		125.178	2.98382	0.0737546	0.00344679	0.28843
DA1_C_25	163	7.4	0.20956	8740	130	490	21	1515000	23000		127.311	2.63976	0.0558197	0.00127167	0.20956
DA1_C_26	163	7.4	-0.35732	16280	460	10510	370	683500	9700		30.425	0.70703	0.642764	0.0145711	-0.35732
DA1_C_27	163	7.4	-0.41734	22360	560	15120	440	689100	9600		21.9145	0.541388	0.67326	0.0129811	-0.41734
DA1_C_28	163	7.4	-0.21003	16480	510	10530	380	712000	14000		31.3552	0.706092	0.636171	0.0151878	-0.21003
DA1_C_29	163	7.4	-0.3783	17540	560	11980	450	590000	12000		24.6882	0.612502	0.680033	0.0168355	-0.3783
DA1_C_30	163	7.4	-0.7245	16280	590	8130	460	1284000	11000		58.0686	1.4743	0.497209	0.0167773	-0.7245
DA1_C_31	163	7.4	0.43284	735	33	470	24	17290	360		17.1379	0.499293	0.636669	0.0217399	0.43284
DA1_C_32	163	7.4	0.34131	443	21	286	16	10130	300		16.5096	0.527375	0.642784	0.02367	0.34131
DA1_C_33	163	7.4	0.32803	1098	39	719	30	30300	1000		20.6936	0.605253	0.651973	0.0179408	0.32803
DA1_C_34	163	7.4	0.23173	1299	30	937	24	12970	430		7.01904	0.20001	0.71818	0.0124385	0.23173
DA1_C_35	163	7.4	0.20663	251	15	48.8	6.4	34280	350		101.488	3.59859	0.193575	0.0140102	0.20663
DA1_C_36	163	7.4	0.3486	1207	35	223	15	172100	3800		103.878	2.44234	0.18395	0.00676656	0.3486
DA1_C_37	163	7.4	0.061926	1231	34	132	20	207300	2700		121.84	2.94685	0.106763	0.00825735	0.061926
DA1_C_38	163	7.4	-0.77769	15990	430	7590	340	1300000	16000		59.3963	1.52448	0.472603	0.0124003	-0.77769
DA1_C_39	163	7.4	0.11173	6676	74	622	24	1157100	7000		125.768	2.61557	0.0927635	0.00187018	0.11173
DA1_C_40	163	7.4	0.11951	1868	95	1307	74	49880	590		19.4793	0.611565	0.696629	0.0266246	0.11951
DA1_C_41	163	7.4	0.34152	757	27	356	14	48500	2300		45.3649	1.36826	0.468228	0.0124838	0.34152
DA1_C_42	163	7.4	0.34553	1267	51	648	34	69400	1100		40.2929	1.04561	0.509215	0.0169111	0.34553
DA2_1	163	7.4	0.23573	24580	350	20110	290	154700	1700		4.58562	0.104047	0.814579	0.00829027	0.23573
DA2_2	163	7.4	0.51222	16570	180	13510	170	232300	1600		10.1703	0.214012	0.811775	0.00677685	0.51222
DA2_3	163	7.4	0.49091	13950	170	11410	150	283500	2300		14.7958	0.31401	0.814356	0.00733095	0.49091
DA2_4	163	7.4	0.34906	16070	180	12910	180	378900	3100		17.1205	0.359671	0.799859	0.00718391	0.34906
DA2_5	163	7.4	0.37674	54070	370	44480	280	134100	890		1.7936	0.0368556	0.819052	0.00382444	0.37674
DA2_6	163	7.4	0.57022	26560	220	21900	200	344700	2400		9.34436	0.194348	0.820954	0.00508305	0.57022
DA2_7	163	7.4	0.19093	26610	280	21710	230	305200	3500		8.26285	0.186995	0.812303	0.0060911	0.19093
DA2_8	163	7.4	0.34205	21220	380	17470	340	398400	2400		13.5481	0.301204	0.819692	0.0108867	0.34205
DA2_9	163	7.4	0.19271	70990	410	58480	440	36870	490		0.373705	0.00791276	0.820187	0.00390678	0.19271
DA2_10	163	7.4	-0.0088579	34800	1100	29200	1100	82100	1500		1.72089	0.0402969	0.835423	0.0206312	-0.0088579
DA2_11	163	7.4	0.43629	25750	330	21470	340	252200	2500		7.00714	0.151394	0.830152	0.00849295	0.43629
DA2_12	163	7.4	0.41139	41410	380	33950	320	97700	1000		1.70508	0.0358249	0.816277	0.00539252	0.41139
DA2_13	163	7.4	0.33564	37240	340	30340	230	56060	580		1.09145	0.0229072	0.811164	0.00483409	0.33564
DA2_14	163	7.4	0.22186	164900	2900	135100	2400	50160	630		0.221781	0.00482322	0.815713	0.0102399	0.22186
DA2_15	163	7.4	0.26159	131610	680	108850	660	69580	710		0.381959	0.00784996	0.82346	0.00329428	0.26159
DA2_16	163	7.4	0.32635	33960	290	27820	250	79790	870		1.69726	0.0353856	0.815628	0.00507766	0.32635
DA2_17	163	7.4	0.10482	134780	980	111030	780	90500	1400		0.479072	0.00999059	0.820196	0.00416443	0.10482
DA2_18	163	7.4	0.32336	27130	370	22630	330	70640	930		1.88837	0.0395377	0.830496	0.00832716	0.32336
DA2_19	163	7.4	0.31459	108610	480	88690	420	133120	900		0.883851	0.0181475	0.813032	0.00264473	0.31459
DA2_20	163	7.4	0.12483	39190	310	32280	250	10530	250		0.193252	0.00455732	0.820089	0.0045592	0.12483
DA2_21	163	7.4	0.032996	81940	460	67040	650	36810	560		0.324966	0.00689026	0.814594	0.00458319	0.032996
DA2_22	163	7.4	0.13555	217900	1400	178500	1200	114680	840		0.377594	0.00777763	0.815613	0.00380887	0.13555
DA2_23	163	7.4	0.22971	84810	520	69920	470	25600	380		0.216945	0.00464861	0.820838	0.00375044	0.22971
DA2_24	163	7.4	0.073767	145500	1600	118900	1400	98770	810		0.488806	0.0103509	0.81362	0.00658283	0.073767
DA2_25	163	7.4	0.13668	156100	630	128220	850	34070	590		0.156488	0.00345159	0.817816	0.00318748	0.13668
DA2_26	163	7.4	0.17996	197800	1000	162000	730	52450	820		0.189355	0.00411166	0.815439	0.00277331	0.17996
DA2_27	163	7.4	0.36379	136820	860	112430	710	155400	1300		0.812294	0.0167683	0.818155	0.00366085	0.36379
DA2_28	163	7.4	0.23357	111930	870	91800	900	82700	1000		0.528768	0.0113539	0.816581	0.00513059	0.23357
DA2_29	163	7.4	0.10642	136500	700	112550	680	75640	750		0.399934	0.00833873	0.820948	0.00326714	0.10642
DA2_30	163	7.4	0.31845	149200	1000	123150	960	66000	1500		0.314626	0.00706562	0.821805	0.0042428	0.31845
DA2_31	163	7.4	0.30473	103680	830	85240	650	93900	1100		0.652599	0.013895	0.818562	0.00454482	0.30473
DA2_32	163	7.4	0.21074	85560	650	70010	590	226900	4600		1.89144	0.0454623	0.81469	0.00464203	0.21074
DA2_33	163	7.4	0.31617	180620	980	148910	770	31360	570		0.123797	0.00276027	0.820845	0.00308964	0.31617
DA2_34	163	7.4	0.3996	30050	230	24550	200	86910	740		2.06459	0.0425795	0.813411	0.0045661	0.3996
DA2_35	163	7.4	0.37567	30120	190	24840	190	84910	740		2.02726	0.042238	0.821107	0.00408828	0.37567
DA2_36	163	7.4	0.61046	13260	130	10770	110	461900	3000		24.9238	0.51919	0.808677	0.00574947	0.61046
DA2_37	163	7.4	0.36226	24160	210	19620	190	297800	3400		8.83705	0.191818	0.808546	0.00528374	0.36226
DA2_38	163	7.4	0.53226	21480	170	17580	150	98430	740		3.27729	0.0683062	0.814868	0.00476241	0.53226
DA2_39	163	7.4	0.41909	26560	190	21680	140	93200	840		2.52524	0.0523251	0.812707	0.00393323	0.41909
DA2_40	163	7.4	0.43818	32230	200	26460	170	137450	870		3.05348	0.0629388	0.817396	0.00366657	0.43818
F8_A_1	163	7.4	0.4081	6410	190	5060	150	57800	1600		8.19693	0.181032	0.785951	0.0165461	0.4081
F8_A_2	163	7.4	0.22725	6040	160	4680	140	71210	730		10.7575	0.261701	0.771457	0.0154802	0.22725
F8_A_3	163	7.4	0.60419	2255	89	1654	73	72000	1500		28.8574	0.769721	0.730284	0.0217142	0.60419
F8_A_4	163	7.4	0.20365	5630	230	4390	190	54800	1100		8.91225	0.222501	0.776353	0.0232037	0.20365
F8_A_5	163	7.4	0.2814	5170	200	4090	160	36200	540		6.48076	0.161501	0.787654	0.021762	0.2814
F8_A_6	163	7.4	0.21273	6900	220	5410	180	25190	330		3.35847	0.0840451	0.780641	0.0180657	0.21273
F8_A_7	163	7.4	0.33897	8170	220	6370	170	98100	1300		10.8066	0.241096	0.776283	0.0147797	0.33897
F8_A_8	163	7.4	0.1872	7880	230	6250	190	20690	360		2.31391	0.0664711	0.78969	0.0167131	0.1872
F8_A_9	163	7.4	0.39159	7500	190	5900	140	23030	360		2.79753	0.0668822	0.783238	0.0136529	0.39159
F8_A_10	163	7.4	0.20028	7950	320	6180	250	38130	390		4.18259	0.122697	0.77397	0.0221808	0.20028
F8_A_11	163	7.4	0.15349	10510	100	8290	87	3350	140		0.281047	0.00834731	0.785335	0.00558675	0.15349
F8_A_12	163	7.4	0.21159	11750	110	9257	93	4070	120		0.311006	0.00781802	0.784396	0.00540931	0.21159
F8_A_13	163	7.4	0.24965	12640	120	9887	95	10040	220		0.710435	0.0164782	0.77879	0.00528281	0.24965
F8_A_14	163	7.4	0.19139	12650	120	9810	100	11610	220		0.821438	0.0190423	0.772114	0.00539928	0.19139
F8_A_15	163	7.4	0.38843	11230	110	8666	98	13480	270		1.07292	0.0242294	0.768319	0.00577255	0.38843
F8_A_16	163	7.4	0.21876	10910	100	8417	80	16620	300		1.36808	0.0302995	0.768131	0.00509348	0.21876
F8_A_17	163	7.4	0.31825	10810	140	8360	110	16620	220		1.35845	0.0304937	0.769987	0.007139	0.31825
F8_A_18	163	7.4	0.38259	2033	40	1453	37	101800	1100		44.6727	0.995579	0.711592	0.0114997	0.38259
F8_A_19	163	7.4	0.62067	2340	42	1735	38	55190	660		21.013	0.47625	0.738221	0.0104979	0.62067
F8_A_20	163	7.4	0.34507	5810	110	4468	80	83000	1300		12.7514	0.279389	0.765667	0.0100197	0.34507
F8_A_21	163	7.4	0.61025	1791	45	1295	40	99650	1500		49.5677	1.12197	0.719908	0.0143949	0.61025
F8_A_22	163	7.4	0.44474	1088	34	787	30	47080	400		38.2189	0.99739	0.720193	0.0178274	0.44474
F8_A_23	163	7.4	0.60717	1595	46	1187	34	104300	1100		57.7311	1.36545	0.740957	0.0151249	0.60717
F8_A_24	163	7.4	0.59845	1408	39	971	32	128600	1100		81.1763	1.9397	0.686625	0.0148443	0.59845
F8_A_25	163	7.4	0.3457	1357	49	1007	39	45380	710		29.2265	0.860467	0.738844	0.0196468	0.3457
F8_A_26	163	7.4	0.56202	1759	57	1307	48	46200	1400		23.2199	0.558641	0.739797	0.0181961	0.56202
F8_A_27	163	7.4	0.47171	903	35	669	32	23200	390		22.5458	0.626699	0.737635	0.0228057	0.47171
F8_A_28	163	7.4	0.43543	4839	63	3757	60	14440	250		2.63634	0.0580108	0.773016	0.00799868	0.43543
F8_A_29	163	7.4	0.22365	3190	100	2407	86	35130	820		9.53539	0.301275	0.751257	0.0179324	0.22365
F8_A_30	163	7.4	0.2659	2556	61	1874	51	69800	2100		24.099	0.692826	0.729981	0.0132692	0.2659
F8_A_31	163	7.4	0.40543	1740	67	1339	60	69380	780		34.7178	0.9277	0.766186	0.0227327	0.40543
F8_A_32	163	7.4	-0.53834	10240	380	5870	350	722000	17000		61.2988	2.23066	0.570744	0.0201294	-0.53834	outlier
F8_A_33	163	7.4	-0.024497	16780	340	12100	280	406000	15000		21.2108	0.726913	0.717954	0.0110897	-0.024497
F8_A_34	163	7.4	-0.006001	18690	220	14050	170	228000	11000		10.4792	0.317541	0.748462	0.00634494	-0.006001
F8_A_35	163	7.4	-0.088633	10630	160	6900	150	588000	11000		48.1315	1.1879	0.646277	0.00858162	-0.088633
F8_A_36	163	7.4	0.48977	2467	55	1650	40	95130	570		34.0098	0.781738	0.665913	0.011014	0.48977
F8_A_37	163	7.4	0.54277	1825	41	1297	32	45540	610		22.0665	0.50358	0.707587	0.0118571	0.54277
F8_A_38	163	7.4	0.28272	2593	90	1813	72	84640	640		28.372	0.733531	0.696143	0.0184387	0.28272
F8_A_39	163	7.4	0.49058	1382	34	945	31	51560	460		32.6793	0.76273	0.680811	0.0140193	0.49058
G_NIST614_1	110	5	0.39657	108000	1000	94220	870	153700	1400		1.36991	0.0279395	0.868605	0.00570402	0.39657
G_NIST614_2	110	5	0.34296	104820	940	91550	880	147300	1200		1.37715	0.0280645	0.869595	0.00574084	0.34296
G_NIST614_3	110	5	0.18178	104930	940	91040	820	143600	1300		1.36014	0.027716	0.863844	0.00551094	0.18178
G_NIST614_4	110	5	0.30939	104100	1100	90220	930	140300	1500		1.3583	0.0276995	0.862889	0.00639683	0.30939
G_NIST614_5	110	5	0.38446	103730	950	90320	790	140000	1100		1.36555	0.0278625	0.866927	0.00551347	0.38446
G_NIST614_6	110	5	0.29452	102570	980	89080	810	137900	1300		1.35712	0.0276213	0.864695	0.00572751	0.29452
G_NIST614_7	110	5	0.16101	102810	890	90000	720	139300	1200		1.35353	0.0276013	0.871586	0.00515929	0.16101
G_NIST614_8	110	5	0.42304	102700	860	89410	770	142100	1200		1.37008	0.0279815	0.866799	0.0052288	0.42304
G_NIST614_9	110	5	0.41377	102010	990	89260	860	141900	1300		1.36765	0.0278806	0.871198	0.00598304	0.41377
G_NIST614_10	110	5	0.38137	102480	870	89610	780	145100	1000		1.36963	0.0279171	0.870603	0.00531593	0.38137
G_NIST614_11	110	5	0.39768	102100	1100	89130	940	147400	1400		1.36982	0.0279319	0.869163	0.00658064	0.39768
G_NIST614_12	110	5	0.3435	99000	1000	86670	880	146400	1400		1.37987	0.028138	0.871639	0.00626918	0.3435
G_NIST614_13	110	5	0.42987	97700	1100	85110	940	146100	1300		1.36599	0.0278626	0.867339	0.00686964	0.42987
G_NIST614_14	110	5	0.44597	96160	970	83780	870	147000	1400		1.36531	0.0277879	0.867459	0.00630667	0.44597
G_NIST614_15	110	5	0.34526	96500	1200	84200	1100	151200	1900		1.36538	0.0277736	0.868736	0.00786867	0.34526
G_NIST614_16	110	5	0.33183	91620	950	80070	890	147300	1500		1.36945	0.0278698	0.870127	0.00664225	0.33183
G_NIST614_17	110	5	0.26733	90100	1100	78700	1000	149000	1800		1.36514	0.0277941	0.869667	0.00769582	0.26733
G_NIST614_18	110	5	0.43648	87760	940	77060	840	148100	1600		1.35774	0.0276547	0.874249	0.00670952	0.43648
G_NIST614_19	110	5	0.11161	82200	750	72190	640	146000	1400		1.38538	0.0282266	0.874396	0.00558632	0.11161
G_NIST614_20	110	5	0.35917	79230	780	69930	660	142100	1500		1.37271	0.0279768	0.878773	0.00601859	0.35917
G_NIST614_21	110	5	0.35663	79820	820	70560	690	144100	1600		1.35293	0.0275257	0.880136	0.00626891	0.35663
G_NIST614_22	110	5	0.38532	81270	940	71350	840	145900	1700		1.32492	0.026971	0.874111	0.00724476	0.38532
G_NIST614_23	110	5	0.33211	72290	720	63670	650	136000	1400		1.36786	0.0279091	0.876919	0.00628093	0.33211
G_NIST614_24	110	5	0.36506	67960	690	59690	620	130200	1400		1.37748	0.0280771	0.874483	0.0063787	0.36506
G_NIST614_25	110	5	0.43412	66360	720	58390	640	128300	1500		1.37951	0.0281622	0.876062	0.00678519	0.43412
JT_1	163	7.4	0.012488	5490	270	4150	230	124000	2100		22.2587	0.722966	0.752625	0.0280054	0.012488
JT_2	163	7.4	-0.14401	25600	2500	19500	1900	156000	2800		6.1651	0.281024	0.758399	0.05254	-0.14401
JT_3	163	7.4	0.2852	732	34	306	23	178900	3400		244.412	6.88251	0.416211	0.0184681	0.2852
JT_4	163	7.4	0.41424	1008	41	426	26	240100	4500		238.969	6.07429	0.420777	0.0154984	0.41424
JT_5	163	7.4	0.046984	1302	77	643	53	260100	2700		201.491	7.62103	0.491703	0.0250502	0.046984
JT_6	163	7.4	0.26344	807	42	279	27	231500	1700		289.498	9.49379	0.344218	0.0189943	0.26344
JT_7	163	7.4	0.25357	1166	50	305	22	391000	12000		335.746	8.30804	0.260438	0.0109752	0.25357
JT_8	163	7.4	0.20171	1576	54	329	27	612000	13000		390.194	8.98096	0.207846	0.00928261	0.20171
JT_9	163	7.4	0.17022	1322	61	375	32	429700	6000		336.762	8.87081	0.282425	0.0137589	0.17022
JT_10	163	7.4	0.13834	2564	53	433	23	1060000	13000		405.097	8.79506	0.168141	0.00481283	0.13834
JT_11	163	7.4	0.074826	978	60	362	34	268400	5000		272.333	8.82179	0.36853	0.0207621	0.074826
JT_12	163	7.4	0.042222	1289	38	369	25	418500	5400		308.685	7.45769	0.285021	0.0105757	0.042222
JT_13	163	7.4	0.47607	1043	53	575	39	180000	1900		159.601	4.89579	0.548891	0.0233611	0.47607
JT_14	163	7.4	0.053742	633	35	214	21	207000	3600		302.62	11.1517	0.336599	0.0190396	0.053742
JT_15	163	7.4	0.041912	1270	60	524	50	327000	4400		229.61	7.86837	0.4108	0.0219657	0.041912
JT_16	163	7.4	0.013827	2470	300	1580	210	232200	3000		83.6287	5.26442	0.636888	0.0575863	0.013827
JT_17	163	7.4	0.19479	1300	32	278	16	514400	5500		354.005	8.33066	0.212914	0.00669306	0.19479
JT_18	163	7.4	0.17143	964	33	280	21	348500	3800		317.401	7.83976	0.28919	0.0119731	0.17143
JT_19	163	7.4	0.0034207	1022	70	575	55	155100	1400		127.592	5.11394	0.56017	0.0330952	0.0034207
JT_20	163	7.4	0.34235	608	24	237	16	199400	2200		269.654	7.28394	0.388104	0.015242	0.34235
JT_21	163	7.4	0.18973	520	27	204	19	164230	840		256.805	8.36045	0.390598	0.0209164	0.18973
JT_22	163	7.4	0.25508	784	34	299	23	299100	4100		299.562	8.24445	0.379715	0.0168389	0.25508
JT_23	163	7.4	0.10569	612	24	248	19	222600	1500		277.232	7.85943	0.403463	0.0174383	0.10569
JT_24	163	7.4	0.014895	957	37	254	26	430500	2600		343.563	9.62975	0.264256	0.0145208	0.014895
JT_25	163	7.4	0.20778	941	36	295	23	375700	5200		293.799	7.63021	0.31213	0.013613	0.20778
JT_26	163	7.4	0.58513	540	25	205	18	213000	1300		286.533	8.9195	0.377975	0.0188415	0.58513
JT_27	163	7.4	0.36383	722	39	335	22	191000	1200		190.277	6.33991	0.461967	0.0197271	0.36383
JT_28	163	7.4	0.28686	1019	42	356	23	399500	5400		282.659	7.49406	0.347839	0.0133866	0.28686
MO1_B_1	163	7.4	0.070574	221300	3000	168600	2300	127600	2200		0.506609	0.010342	0.758541	0.00732606	0.070574
MO1_B_2	163	7.4	0.097255	205500	1600	157500	1300	81320	640		0.343428	0.00717804	0.763083	0.0043482	0.097255
MO1_B_3	163	7.4	0.28881	28570	190	21390	150	435500	4200		13.099	0.273227	0.745424	0.00361787	0.28881
MO1_B_4	163	7.4	-2.1405e-05	135300	3700	103100	2800	339700	3100		2.17614	0.0581011	0.758689	0.0146843	-2.1405e-05
MO1_B_5	163	7.4	0.070872	76900	2900	58200	2200	378900	2300		4.27532	0.12484	0.753528	0.0202054	0.070872
MO1_B_6	163	7.4	0.15691	88900	1600	67800	1200	96000	830		0.945175	0.0203705	0.759331	0.00962561	0.15691
MO1_B_7	163	7.4	0.11126	55300	1100	42160	870	169900	1300		2.6844	0.0637626	0.759064	0.0109257	0.11126
MO1_B_8	163	7.4	-0.075643	281400	5000	215800	3800	76400	2500		0.233178	0.00759993	0.763537	0.00959202	-0.075643
MO1_B_9	163	7.4	0.020852	205600	4100	157600	3300	108200	1800		0.451745	0.0122941	0.763196	0.0110825	0.020852
MO1_B_10	163	7.4	0.14047	144800	4500	111500	3400	130600	2800		0.778661	0.024589	0.766671	0.0167631	0.14047
MO1_B_11	163	7.4	-0.18863	84100	4200	64700	3400	148300	2500		1.52574	0.0562497	0.765969	0.0278862	-0.18863
MO1_B_12	163	7.4	0.18664	37190	580	28180	450	195900	1400		4.53409	0.102521	0.754428	0.00845663	0.18664
MO1_B_13	163	7.4	0.37925	44480	280	33950	220	186900	1700		3.6182	0.0740883	0.759938	0.00344778	0.37925
MO1_B_14	163	7.4	0.034965	470000	1600	361300	1200	40500	1700		0.0704007	0.00212437	0.765373	0.00182805	0.034965
MO1_B_15	163	7.4	0.13664	75010	940	56780	730	699000	12000		7.96223	0.196945	0.753666	0.00679517	0.13664
MO1_B_16	163	7.4	0.12393	93000	1200	70240	910	471000	13000		4.26703	0.124382	0.751977	0.00690504	0.12393
MO1_B_17	163	7.4	0.18421	27800	200	20960	170	183700	1000		5.68816	0.118575	0.750671	0.00408705	0.18421
MO1_B_18	163	7.4	0.3839	25850	170	19760	140	253900	2600		8.47019	0.175148	0.761078	0.00369469	0.3839
MO1_B_19	163	7.4	0.214	48380	560	36960	450	170400	1400		3.02405	0.0630349	0.760622	0.00641697	0.214
MO1_B_20	163	7.4	0.33126	22930	220	17150	170	364700	1800		13.6072	0.285168	0.744669	0.00515896	0.33126
MO1_B_21	163	7.4	0.24415	159000	1200	122250	920	153600	1100		0.822416	0.016825	0.765517	0.00409731	0.24415
MO1_B_22	163	7.4	0.087803	148500	2400	113200	1800	77270	600		0.448479	0.00983902	0.758967	0.0086415	0.087803
MO1_B_23	163	7.4	0.011287	190700	4500	146100	3400	146800	1300		0.647427	0.0166241	0.762786	0.0126955	0.011287
MO1_B_24	163	7.4	0.064171	147700	2900	113400	2200	57270	470		0.332953	0.00757287	0.764426	0.0105961	0.064171
MO1_B_25	163	7.4	-0.11903	55000	1100	42000	1200	367700	5400		5.68976	0.124141	0.760308	0.0133162	-0.11903
MO1_B_26	163	7.4	0.22863	205000	6200	159200	4300	110800	4600		0.446839	0.0176755	0.773201	0.015745	0.22863
MO1_B_27	163	7.4	0.20158	87400	2900	66500	2100	213300	2700		2.07438	0.0617494	0.757553	0.0174262	0.20158
MO1_B_28	163	7.4	0.012739	39830	580	30090	640	245100	2500		5.21131	0.11679	0.752168	0.00973666	0.012739
MO1_B_29	163	7.4	0.21811	128500	3200	98000	2300	343600	7300		2.30611	0.048948	0.759322	0.0130486	0.21811
MO1_B_30	163	7.4	-0.041404	485600	7700	371800	6000	79200	2700		0.136051	0.00386087	0.762314	0.00866116	-0.041404
MO1_B_31	163	7.4	0.21381	46300	1300	34890	930	311500	2000		5.79158	0.145469	0.750279	0.0145872	0.21381
MO1_B_32	163	7.4	0.28446	33440	360	25560	270	99880	1200		2.5385	0.052605	0.761023	0.00576419	0.28446
MO1_B_33	163	7.4	0.25438	135700	1000	103820	780	178930	940		1.11931	0.0229452	0.761735	0.00402572	0.25438
MO1_B_34	163	7.4	0.18282	248200	3800	190300	2900	40800	1700		0.137852	0.00464108	0.763379	0.00828123	0.18282
MO1_B_35	163	7.4	0.34448	152800	3000	116800	2100	97300	2700		0.526296	0.0162544	0.761066	0.0101749	0.34448
MO1_B_36	163	7.4	0.068946	65400	960	49720	790	192300	2000		2.50152	0.0519968	0.756931	0.00822269	0.068946
MO1_B_37	163	7.4	0.12241	170600	2300	131100	1700	64280	910		0.325677	0.00694757	0.765115	0.00718738	0.12241
MO1_B_38	163	7.4	0.11974	55940	970	42250	790	466100	4700		6.94456	0.16586	0.751982	0.0096301	0.11974
MO1_B_39	163	7.4	0.15764	116000	2600	88500	2000	330000	8700		2.36232	0.0763918	0.759606	0.0121417	0.15764
MO1_B_40	163	7.4	0.46583	28060	210	21200	190	251500	2600		7.51766	0.154387	0.752231	0.0044108	0.46583
MO1_B_41	163	7.4	0.056443	78990	930	60130	750	586800	8300		6.31461	0.142574	0.757918	0.00652839	0.056443
MO1_B_42	163	7.4	-0.14593	105370	860	80040	860	249600	9900		1.96078	0.0587995	0.756298	0.0051247	-0.14593
MO1_B_43	163	7.4	0.35982	15960	210	11030	130	1285000	19000		67.2814	1.40835	0.68809	0.00610405	0.35982
MO1_B_44	163	7.4	0.10416	133300	1200	101640	880	228200	1200		1.43226	0.0296556	0.759167	0.00476178	0.10416
MO1_B_45	163	7.4	0.030719	210600	1000	161290	850	207000	3500		0.81298	0.0181977	0.762521	0.00271637	0.030719
MO1_B_46	163	7.4	0.10226	45300	470	34410	420	295600	2300		5.48702	0.114802	0.756292	0.00608426	0.10226
MO1_B_47	163	7.4	0.25864	157300	1400	119800	1100	335900	3800		1.79255	0.0373554	0.758282	0.00486952	0.25864
MO1_B_48	163	7.4	0.1942	436800	1900	336300	1500	37010	580		0.0705506	0.00151036	0.766562	0.00239836	0.1942
MO1_B_49	163	7.4	0.2887	36880	630	28120	460	281300	1900		6.39805	0.146209	0.75915	0.00901694	0.2887
MO1_B_50	163	7.4	0.23112	47370	370	36320	310	246800	3800		4.3432	0.0975753	0.763388	0.00443545	0.23112
MO1_B_51	163	7.4	0.47169	21630	200	15290	150	1313700	4700		50.6172	1.05368	0.703808	0.0047648	0.47169
MO1_B_52	163	7.4	0.14143	27710	300	20030	260	1153000	11000		34.5641	0.768322	0.719693	0.00610905	0.14143
MO1_B_53	163	7.4	0.27653	34870	650	25600	470	967000	7600		22.9378	0.508811	0.730956	0.00960412	0.27653
MO1_B_54	163	7.4	0.445	7960	100	4502	84	1434100	7000		148.39	3.11016	0.563113	0.00636092	0.445
MO1_B_55	163	7.4	0.31427	26320	150	19610	140	181400	1300		5.69719	0.117662	0.741813	0.00340306	0.31427
MO1_B_56	163	7.4	0.18074	9810	240	6320	170	589000	11000		49.3235	1.37827	0.641433	0.0117124	0.18074	outlier
MO1_B_57	163	7.4	0.26093	12790	250	8440	170	406600	5700		26.5503	0.629835	0.657014	0.00926068	0.26093	outlier
MO1_B_58	163	7.4	0.2951	44200	1100	32140	810	81700	1200		1.53573	0.0336263	0.72398	0.0128775	0.2951
MO1_B_59	163	7.4	0.34386	27800	1200	20260	810	90400	1100		2.72289	0.0768291	0.7256	0.0214392	0.34386
MO1_B_60	163	7.4	0.50783	15390	520	11370	310	100800	1400		5.37856	0.14844	0.735571	0.0160379	0.50783
MO1_B_61	163	7.4	0.23726	29810	200	22060	150	94000	1500		2.60929	0.0556455	0.736795	0.00353447	0.23726
MO2_A_1	163	7.4	0.025106	486000	5300	338300	3600	26700	400		0.0451673	0.00103684	0.693057	0.00530317	0.025106
MO2_A_2	163	7.4	0.16677	182330	930	126820	730	51670	810		0.232682	0.00504087	0.69252	0.00267472	0.16677
MO2_A_3	163	7.4	-0.030611	221200	1000	150090	680	27730	310		0.102875	0.00215386	0.675569	0.00217139	-0.030611
MO2_A_4	163	7.4	0.05525	180300	2600	126200	1800	62060	900		0.281481	0.00683768	0.696894	0.00709834	0.05525
MO2_A_5	163	7.4	0.2376	283000	4000	196900	2700	88300	1200		0.257922	0.00561234	0.692727	0.00685077	0.2376
MO2_A_6	163	7.4	0.15434	181600	7100	126000	4900	81600	2200		0.38567	0.00891253	0.690808	0.0191305	0.15434
MO2_A_7	163	7.4	-0.11218	587200	3900	407800	2800	46200	1500		0.0632488	0.0017826	0.691455	0.00331712	-0.11218
MO2_A_8	163	7.4	-0.028044	468600	9800	325300	6900	132500	2300		0.234624	0.00601106	0.69117	0.0103391	-0.028044
MO2_A_9	163	7.4	0.079425	192800	2700	132800	1800	65100	1700		0.281253	0.00746176	0.685794	0.00671208	0.079425
MO2_A_10	163	7.4	0.16379	179320	790	121380	510	77170	670		0.351652	0.00726767	0.67394	0.00206043	0.16379
MO2_A_11	163	7.4	-0.023048	536700	5300	372800	3600	43230	980		0.0645971	0.00140941	0.691588	0.00479699	-0.023048
MO2_A_12	163	7.4	0.032568	135340	880	95220	610	52340	880		0.310451	0.0066939	0.700495	0.003211	0.032568
MO2_A_13	163	7.4	0.3972	319000	4800	226200	3200	96300	2000		0.242453	0.00630447	0.706	0.00732241	0.3972
MO2_A_14	163	7.4	0.23758	158410	680	109380	450	65880	910		0.331984	0.00715036	0.687477	0.00205275	0.23758
MO2_A_15	163	7.4	-0.031527	333000	11000	230700	7500	34780	800		0.0903591	0.00239953	0.689773	0.0160545	-0.031527
MO2_A_16	163	7.4	0.065389	204500	1200	143330	810	40020	460		0.158418	0.00336862	0.697825	0.00285496	0.065389
MO2_A_17	163	7.4	0.036362	833400	5800	578300	4000	24890	570		0.0240294	0.000553573	0.69088	0.00340431	0.036362
MO2_A_18	163	7.4	0.144	198900	4300	137200	3000	51400	1400		0.207709	0.00637461	0.686787	0.0106052	0.144
MO2_A_19	163	7.4	0.17816	336300	3000	232100	2100	34810	510		0.0844296	0.00186062	0.687149	0.00438454	0.17816
MO2_A_20	163	7.4	0.20043	153500	3000	105900	2000	82020	690		0.428431	0.0101613	0.686895	0.00937505	0.20043
MO2_A_21	163	7.4	-0.080904	1008000	7900	701700	5500	26610	740		0.0210305	0.000537006	0.693097	0.00385802	-0.080904
MO2_A_22	163	7.4	-0.10762	638000	10000	443200	7400	13730	450		0.0169228	0.000520262	0.691643	0.00795432	-0.10762
MO2_A_23	163	7.4	0.14307	136240	790	92360	560	61690	550		0.361929	0.00762442	0.674966	0.00284377	0.14307
MO2_A_24	163	7.4	0.041616	823500	8200	571800	5700	27600	1000		0.0270434	0.000806246	0.691327	0.00489166	0.041616
MO2_A_25	163	7.4	0.23623	123000	840	83550	550	73030	650		0.47684	0.00976532	0.676308	0.00322157	0.23623
MO2_A_26	163	7.4	0.35618	114900	1400	78770	910	49010	590		0.337348	0.00722063	0.682565	0.00575543	0.35618
MO2_A_27	163	7.4	0.04803	725300	3600	504000	2400	16460	370		0.0180547	0.000427801	0.691856	0.00238983	0.04803
MO2_A_28	163	7.4	0.32193	87000	1200	60400	890	90400	1500		0.831284	0.0176839	0.691227	0.00700622	0.32193
MO2_A_29	163	7.4	0.2113	59670	340	40880	230	33730	340		0.450445	0.00943345	0.682115	0.00274301	0.2113
MO2_A_30	163	7.4	0.15199	98300	880	67490	630	57050	660		0.462811	0.0101159	0.683579	0.00443993	0.15199
MO2_A_31	163	7.4	0.023261	180400	1700	124500	1200	48410	560		0.212731	0.00474198	0.687125	0.00465142	0.023261
MO2_A_32	163	7.4	0.12178	429400	4000	296200	2900	45800	490		0.0847335	0.00183828	0.686793	0.00466103	0.12178
MO2_A_33	163	7.4	0.12551	107110	430	74330	330	26200	370		0.194256	0.00419394	0.690935	0.00207688	0.12551
MO2_A_34	163	7.4	0.17511	110000	1200	75030	780	55590	710		0.397157	0.00841778	0.679118	0.00513929	0.17511
MO2_A_35	163	7.4	0.10126	160900	4100	110400	2800	68060	680		0.332467	0.00826123	0.68315	0.0123341	0.10126
MO2_A_36	163	7.4	0.042091	375700	2200	258000	1600	12320	320		0.0257471	0.000596642	0.683725	0.00292861	0.042091

## Sheet: 2019-09-25
Raw Data											Final Data (WC-1 corrected)
	Crater Size	Pulse rate	ErrorCorrelation_38_6vs7_6	Pb206_CPS	Pb206_CPS_Int2SE	Pb207_CPS	Pb207_CPS_Int2SE	U238_CPS	U238_CPS_Int2SE		corr 238/206	1SE prop	ROM 207/206 corr	1SE	err corr
AR6_A_1	163	7.4	-0.3305	36580	310	29690	370	55800	700		1.33407	0.0268001	0.804595	0.00611599	-0.3305
AR6_A_2	163	7.4	0.078669	174000	1400	141000	1100	61520	890		0.310391	0.00617202	0.803305	0.00454082	0.078669
AR6_A_3	163	7.4	-0.15784	83200	1400	68000	1100	41750	980		0.438912	0.00990489	0.810207	0.00953858	-0.15784
AR6_A_4	163	7.4	0.25291	104060	670	83500	520	77280	930		0.648298	0.012916	0.795451	0.00359387	0.25291
AR6_A_5	163	7.4	0.52687	97600	2000	79300	1600	54320	970		0.483264	0.00971438	0.805441	0.0116828	0.52687
AR6_A_6	163	7.4	0.27599	141320	970	113500	770	110000	1300		0.68163	0.0132561	0.796165	0.00387546	0.27599
AR6_A_7	163	7.4	-0.1013	120000	4400	97700	3500	55600	1800		0.407779	0.0112059	0.807094	0.0208679	-0.1013
AR6_A_8	163	7.4	0.13075	59670	440	47750	370	46800	670		0.68113	0.013563	0.793283	0.00427988	0.13075
AR6_A_9	163	7.4	0.1814	117000	2100	95700	1700	48590	650		0.359516	0.00777178	0.810843	0.0103278	0.1814
AR6_A_10	163	7.4	0.22697	55530	980	44910	820	75600	1300		1.17806	0.0230621	0.801726	0.0102686	0.22697
AR6_A_11	163	7.4	0.15617	92400	1200	74800	1000	50350	660		0.472716	0.00952732	0.802491	0.00754414	0.15617
AR6_A_12	163	7.4	0.17381	73800	3900	60100	3100	31100	1300		0.369974	0.00906103	0.807288	0.0300687	0.17381
AR6_A_13	163	7.4	0.19285	149000	1900	123000	1700	39800	1400		0.230738	0.00588182	0.818332	0.00776181	0.19285
AR6_A_14	163	7.4	-0.16484	125000	3400	103000	3200	47700	1300		0.330123	0.00781794	0.816842	0.0170124	-0.16484
AR6_A_15	163	7.4	0.12439	168000	1800	136000	1500	13990	350		0.0721981	0.00166124	0.802491	0.00622391	0.12439
AR6_A_16	163	7.4	0.21683	79520	790	64980	690	64400	1100		0.702731	0.0141536	0.810054	0.00594127	0.21683
AR6_A_17	163	7.4	0.28664	59190	500	47950	370	49660	570		0.730582	0.0145745	0.803065	0.00463427	0.28664
AR6_A_18	163	7.4	0.63785	106000	4500	87500	3800	13080	550		0.106847	0.00331175	0.8183	0.025066	0.63785
AR6_A_19	163	7.4	-0.10225	218000	5300	180000	4200	72000	2600		0.282867	0.00617091	0.818515	0.0139118	-0.10225
AR6_A_20	163	7.4	0.19353	125000	2800	102000	2600	43600	1800		0.302088	0.00722965	0.808911	0.013845	0.19353
AR6_A_21	163	7.4	0.32847	116000	1600	93100	1100	45200	1400		0.325002	0.00953832	0.795614	0.00728819	0.32847
AR6_A_22	163	7.4	0.37472	108000	1700	88000	1400	65330	700		0.522266	0.0112559	0.807736	0.00911783	0.37472
AR6_A_23	163	7.4	0.17829	48900	380	39860	310	54340	570		0.955278	0.0192176	0.808052	0.00448088	0.17829
AR6_A_24	163	7.4	0.16667	67060	610	55490	610	52600	1000		0.674837	0.0139483	0.820279	0.00590334	0.16667
AR6_A_25	163	7.4	0.32193	89000	1700	72400	1400	70000	2200		0.671662	0.0137657	0.806416	0.0110554	0.32193
AR6_A_26	163	7.4	0.49387	72100	1400	58050	710	30650	820		0.364358	0.00858425	0.798137	0.00923827	0.49387
AR6_A_27	163	7.4	0.34556	40000	1500	32800	1300	27420	820		0.589013	0.0156922	0.812876	0.0223708	0.34556
AR6_A_28	163	7.4	0.44788	171000	2200	140000	2000	64000	2200		0.318574	0.00805351	0.811601	0.0078699	0.44788
AR6_A_29	163	7.4	0.061347	4700	3900	4200	3400	1230	980		0.19945	0.00544437	0.885854	0.517966	0.061347
AR6_A_30	163	7.4	0.10799	256000	3200	206000	2000	65300	1800		0.211727	0.00460958	0.797697	0.00636809	0.10799
AR6_A_31	163	7.4	0.10634	136000	5400	110000	4300	39200	530		0.245478	0.0067547	0.801797	0.0225336	0.10634
AR6_A_32	163	7.4	0.25849	210000	4800	173000	4500	74500	2100		0.307262	0.00697863	0.816653	0.0142632	0.25849
AR6_A_33	163	7.4	0.19238	330000	1900	267000	1600	64630	650		0.166028	0.00331079	0.802062	0.00336186	0.19238
AR6_A_34	163	7.4	0.11088	131000	2100	106000	1900	18010	550		0.117869	0.00306426	0.802131	0.00972901	0.11088
AR6_A_35	163	7.4	0.22196	164000	2200	133000	1900	48100	1100		0.248324	0.00547013	0.80393	0.00794626	0.22196
AR6_B_1	163	7.4	0.24499	110000	2000	88800	1800	24700	1000		0.187403	0.0049691	0.80026	0.0109909	0.24499
AR6_B_2	163	7.4	0.021055	51620	560	41460	470	9570	290		0.157721	0.00386734	0.7962	0.00630123	0.021055
AR6_B_3	163	7.4	0.36747	73400	9000	61900	7400	10500	2400		0.107522	0.00775316	0.835998	0.0722093	0.36747
AR6_B_4	163	7.4	0.0067504	67400	2200	54200	1800	43260	980		0.520373	0.0164554	0.797168	0.018723	0.0067504
AR6_B_5	163	7.4	-0.017473	101800	960	82090	780	11020	470		0.0906988	0.00237056	0.79938	0.00539756	-0.017473
AR6_B_6	163	7.4	0.30666	25650	310	20800	240	46990	780		1.54906	0.0323491	0.803871	0.00677494	0.30666
AR6_B_7	163	7.4	0.023119	48900	1200	40200	1200	54000	1400		0.938627	0.0186971	0.814944	0.0158839	0.023119
AR6_B_8	163	7.4	0.39415	137000	1000	110420	610	9500	290		0.057197	0.00144502	0.798983	0.00368904	0.39415
AR6_B_9	163	7.4	0.25209	67690	810	54790	610	19420	450		0.239854	0.00509479	0.802393	0.00661486	0.25209
AR6_B_10	163	7.4	-0.15606	164000	2900	132000	2300	4890	150		0.0254863	0.000666125	0.797886	0.00999063	-0.15606
AR6_B_11	163	7.4	0.41953	34400	1500	27390	900	9520	430		0.224691	0.00940966	0.789304	0.0217365	0.41953
AR6_B_12	163	7.4	0.46179	24500	760	19280	320	23610	370		0.820764	0.0198026	0.780102	0.0138429	0.46179
AR6_B_13	163	7.4	0.31379	82200	1700	67200	1300	29120	750		0.301885	0.00638214	0.810416	0.0115756	0.31379
AR6_B_14	163	7.4	0.15051	40100	2500	31300	1900	25940	910		0.544308	0.0204147	0.773768	0.0339598	0.15051
AR6_B_15	163	7.4	0.38017	74000	4100	58400	3100	43200	2400		0.488926	0.0160205	0.782333	0.0302772	0.38017
AR6_B_16	163	7.4	0.41884	94900	3700	77500	2900	25600	1000		0.223154	0.00634187	0.809555	0.0220658	0.41884
AR6_B_17	163	7.4	-0.18505	276000	3700	222000	2800	8340	690		0.0232903	0.000950013	0.79736	0.00740255	-0.18505
AR6_B_18	163	7.4	0.18384	97700	2000	79600	1500	15140	390		0.128922	0.00289705	0.807661	0.0113345	0.18384
AR6_B_19	163	7.4	0.37757	56300	1700	46100	1400	21450	630		0.312508	0.00736186	0.811714	0.0175334	0.37757
AR6_B_20	163	7.4	0.393	29860	570	24600	440	22770	440		0.628487	0.0142857	0.816688	0.0107756	0.393
AR6_B_21	163	7.4	0.5354	24700	1000	20140	710	30950	480		1.04292	0.0281565	0.808301	0.0218863	0.5354
AR6_B_22	163	7.4	0.28671	34920	560	28530	390	32500	1200		0.756898	0.0217873	0.809913	0.00860811	0.28671
AR6_B_23	163	7.4	0.3791	52600	2300	42600	1800	50500	1600		0.818779	0.0177463	0.80285	0.0246229	0.3791
AR6_B_24	163	7.4	0.32798	62870	670	50560	640	56400	980		0.743445	0.0148232	0.797213	0.00665351	0.32798
AR6_B_25	163	7.4	0.19167	24500	1600	20400	1300	13720	510		0.4568	0.0132128	0.825419	0.0379881	0.19167
AR6_B_26	163	7.4	0.34263	22300	1300	18400	1100	39150	780		1.45827	0.045134	0.817944	0.0344488	0.34263
AR6_B_27	163	7.4	0.44933	66600	2300	54800	2000	36000	1100		0.440746	0.0100718	0.815675	0.0206716	0.44933
AR6_B_28	163	7.4	0.63358	211000	5000	168000	3400	14100	1400		0.0530983	0.00274058	0.789292	0.012406	0.63358
AR6_B_29	163	7.4	0.28134	54900	2300	45300	1900	36030	940		0.551749	0.0126005	0.817968	0.0244577	0.28134
AR6_B_30	163	7.4	0.16343	222000	4100	178000	3500	10450	340		0.0398512	0.000889052	0.794836	0.0108148	0.16343
AR6_B_31	163	7.4	0.27376	71400	1700	58700	1600	35540	660		0.401653	0.00985628	0.814987	0.0148772	0.27376
AR6_B_32	163	7.4	0.27656	24680	680	20630	620	24500	620		0.808189	0.0228515	0.828638	0.0170406	0.27656
AR6_B_33	163	7.4	0.34581	44200	1100	36500	1100	50210	590		0.928976	0.0212202	0.818618	0.0161378	0.34581
AR6_B_34	163	7.4	0.30879	164000	3300	136000	2800	32880	930		0.1641	0.00365669	0.822064	0.0119366	0.30879
AR6_B_35	163	7.4	0.36563	70100	1400	57200	1100	27850	690		0.327261	0.0073593	0.808888	0.0113115	0.36563
AR7_A_1	163	7.4	0.17059	39910	230	33180	240	25880	400		0.531521	0.0108714	0.824148	0.0038444	0.17059
AR7_A_2	163	7.4	0.073224	116850	980	96190	860	29730	370		0.209567	0.0043041	0.816041	0.0050456	0.073224
AR7_A_3	163	7.4	0.37213	22580	190	18500	160	73930	810		2.67379	0.0521163	0.812191	0.00494315	0.37213
AR7_A_4	163	7.4	0.27028	68550	660	56680	550	62910	670		0.751546	0.0148095	0.819659	0.0056513	0.27028
AR7_A_5	163	7.4	0.37938	26640	600	22650	610	63430	950		1.93783	0.0420924	0.842839	0.0149249	0.37938
AR7_A_6	163	7.4	0.19495	164000	2000	135000	1700	99700	1200		0.500001	0.00966555	0.816019	0.00721502	0.19495
AR7_A_7	163	7.4	0.059649	105000	1000	86450	890	69110	610		0.536749	0.0104212	0.816181	0.00577346	0.059649
AR7_A_8	163	7.4	0.12143	311000	1300	257000	1100	47820	650		0.125357	0.00247416	0.819188	0.00247195	0.12143
AR7_A_9	163	7.4	0.18373	185000	1600	153000	1300	46070	480		0.201725	0.0039888	0.819842	0.00501348	0.18373
AR7_A_10	163	7.4	0.33199	40190	550	33130	440	70730	570		1.43045	0.0295044	0.817173	0.00786002	0.33199
AR7_A_11	163	7.4	0.0094093	63460	740	52690	630	45520	770		0.582442	0.0120306	0.823074	0.00693351	0.0094093
AR7_A_12	163	7.4	0.42603	19310	370	16350	370	71200	1400		2.93491	0.062869	0.839356	0.0125535	0.42603
AR7_A_13	163	7.4	0.27711	33300	1700	27500	1400	101000	1300		2.47857	0.0705758	0.818652	0.0297697	0.27711
AR7_A_14	163	7.4	0.57205	28000	770	22610	560	87700	1100		2.54807	0.0567207	0.800485	0.0149425	0.57205
AR7_A_15	163	7.4	0.50342	35730	670	29350	580	94000	1300		2.10583	0.0422182	0.814302	0.011189	0.50342
AR7_A_16	163	7.4	0.019705	97800	1300	79800	1100	77400	1000		0.633498	0.0123247	0.808862	0.00781249	0.019705
AR7_A_17	163	7.4	0.022709	202000	1300	168000	1200	63410	670		0.252779	0.00485638	0.824458	0.00399809	0.022709
AR7_A_18	163	7.4	0.038037	143150	530	118210	480	78950	890		0.443846	0.00879396	0.818603	0.00226886	0.038037
AR7_A_19	163	7.4	0.064882	298000	3100	246000	2400	14670	330		0.0392284	0.00090583	0.818332	0.00588656	0.064882
AR7_A_20	163	7.4	0.075678	92870	730	76830	620	84500	1300		0.728998	0.0141648	0.820098	0.00465982	0.075678
AR7_A_21	163	7.4	-0.078084	182380	980	150740	810	57100	1200		0.247737	0.00527591	0.819336	0.00314043	-0.078084
AR7_A_22	163	7.4	0.26761	164000	1100	135950	980	68280	560		0.332005	0.00641519	0.821762	0.00408114	0.26761
AR7_A_23	163	7.4	0.17135	110000	1100	90860	960	74620	870		0.540006	0.0104126	0.818824	0.00600818	0.17135
AR7_A_24	163	7.4	0.17876	74000	1400	61100	1300	146000	5200		1.49912	0.0335638	0.818503	0.0117541	0.17876
AR7_A_25	163	7.4	0.15515	242000	2700	199000	2400	53800	1000		0.180492	0.00363922	0.81517	0.00675512	0.15515
AR7_A_26	163	7.4	0.05641	233000	1800	192000	1500	73800	1500		0.254013	0.00519639	0.816876	0.00452686	0.05641
AR7_A_27	163	7.4	0.22901	227000	3500	188000	3100	73000	1000		0.257725	0.004998	0.820999	0.00934823	0.22901
AR7_A_28	163	7.4	0.26522	81500	1300	67600	1100	94360	870		0.926749	0.0182017	0.822242	0.00945003	0.26522
AR7_A_29	163	7.4	0.22826	238000	4100	196000	3300	66300	1100		0.218652	0.00459936	0.816375	0.00991867	0.22826
AR7_A_30	163	7.4	0.088059	33930	720	28030	620	12150	820		0.255543	0.0105977	0.818936	0.0126611	0.088059
AR7_A_31	163	7.4	0.36489	45470	930	36940	860	1670000	52000		28.8107	0.683729	0.805346	0.0125879	0.36489
AR7_A_32	163	7.4	0.3663	44110	860	36200	900	1030000	32000		18.3802	0.442247	0.813546	0.0129646	0.3663
AR7_A_33	163	7.4	0.16156	66100	1400	54900	1000	34800	2700		0.374202	0.0142137	0.823344	0.0116009	0.16156
AR7_A_34	163	7.4	0.62979	80900	1500	64700	1000	2520000	9600		24.6683	0.50745	0.792805	0.00965244	0.62979
AR7_A_35	163	7.4	0.39184	57360	340	47180	260	127000	1000		1.75311	0.0336907	0.815379	0.00332853	0.39184
AR7_A_36	163	7.4	0.23901	101340	860	83540	690	89700	1200		0.698909	0.0134811	0.817192	0.00488106	0.23901
AR7_A_37	163	7.4	0.35816	93830	840	76610	760	96100	1500		0.807406	0.0159472	0.809384	0.00545512	0.35816
AR7_A_38	163	7.4	0.67819	45290	370	35640	260	2560000	12000		44.4421	0.861106	0.780092	0.00430949	0.67819
AR7_A_39	163	7.4	0.15508	44030	320	34400	340	2770000	51000		49.7492	1.03895	0.774498	0.00479248	0.15508
AR7_A_40	163	7.4	0.30697	44200	1000	34330	800	1980000	35000		35.2872	0.733898	0.769949	0.0126133	0.30697
AR7_A_41	163	7.4	0.1814	70850	500	58500	420	15990	470		0.17518	0.00392468	0.818515	0.00415618	0.1814
AR7_A_42	163	7.4	0.53972	33900	210	26940	190	1530000	5600		35.5895	0.677651	0.787786	0.00372986	0.53972
AR7_B_1	163	7.4	0.29025	56000	480	45850	360	1545	90		0.0214609	0.00124306	0.811637	0.00475859	0.29025
AR7_B_2	163	7.4	0.072826	138000	1700	113000	1500	1930	160		0.0121902	0.000702886	0.811727	0.00741449	0.072826
AR7_B_3	163	7.4	-0.18767	49730	490	40680	410	3420	150		0.0540733	0.00152698	0.810911	0.00576492	-0.18767
AR7_B_4	163	7.4	0.151	34620	330	28140	290	2520	170		0.0534329	0.00200507	0.805764	0.00570523	0.151
AR7_B_5	163	7.4	-0.07573	58360	420	47630	420	17170	300		0.227214	0.00470514	0.809051	0.00464465	-0.07573
AR7_B_6	163	7.4	0.030634	55800	1100	45050	920	2440	160		0.0342004	0.00123081	0.800334	0.0114579	0.030634
AR7_B_7	163	7.4	0.35486	96400	2200	78400	1800	1310	150		0.193796	0.0163195	0.806213	0.0131637	0.35486
AR7_B_8	163	7.4	0.13323	40670	760	33150	530	4270	190		0.0790204	0.00249475	0.808016	0.0100229	0.13323
AR7_B_9	163	7.4	0.32347	117000	33000	96000	28000	49000	21000		0.356717	0.0223016	0.813385	0.166456	0.32347
AR7_B_10	163	7.4	-0.094256	45030	340	37010	270	2980	150		0.0506146	0.00149501	0.814756	0.00431461	-0.094256
AR7_B_11	163	7.4	0.17461	14850	490	11970	360	3490	140		0.178034	0.00593164	0.799058	0.0179938	0.17461
AR7_B_12	163	7.4	0.19376	93000	27000	75000	21000	42000	17000		0.158269	0.0164211	0.799446	0.162639	0.19376
AR7_B_13	163	7.4	0.17939	25910	190	20790	160	4090	160		0.1205	0.00325675	0.795422	0.00426482	0.17939
AR7_B_14	163	7.4	0.012558	158000	5000	132000	4300	56500	1600		0.280372	0.00555616	0.828185	0.0189713	0.012558
AR7_B_15	163	7.4	0.10832	63760	620	51990	570	9480	270		0.113568	0.00275921	0.808318	0.00597469	0.10832
AR7_B_16	163	7.4	0.12607	21240	230	17400	260	2430	120		0.0862383	0.00286049	0.812092	0.00755871	0.12607
AR7_B_17	163	7.4	-0.16646	60600	2700	49700	2400	3490	170		0.0433702	0.00156811	0.813007	0.0269429	-0.16646
AR7_B_18	163	7.4	-0.042884	96500	1100	79100	1000	28390	410		0.226715	0.00471722	0.812568	0.00697654	-0.042884
AR7_B_19	163	7.4	-0.0017819	27100	2200	22200	1800	2490	350		0.0688019	0.00333212	0.812072	0.0469954	-0.0017819
AR7_B_20	163	7.4	-0.11294	102000	4700	82500	3700	3170	210		0.0234719	0.00106185	0.801797	0.026004	-0.11294
AR7_B_21	163	7.4	0.14547	48700	1600	39600	1200	4050	210		0.0633066	0.00237671	0.806078	0.0181718	0.14547
AR7_B_22	163	7.4	0.061736	68200	3100	55900	2300	3060	310		0.0335578	0.00173072	0.812527	0.0251267	0.061736
AR7_B_23	163	7.4	0.17548	49890	510	40660	430	5400	170		0.082624	0.00199262	0.807913	0.00599367	0.17548
AR7_B_24	163	7.4	0.27708	53090	390	43760	350	3500	130		0.0513155	0.0013641	0.8171	0.00447564	0.27708
AR7_B_25	163	7.4	0.037241	98090	480	80690	480	4070	200		0.0302729	0.000965822	0.815466	0.0031682	0.037241
AR7_B_26	163	7.4	0.096565	47430	560	38890	460	4510	160		0.0721078	0.00182782	0.812822	0.00685169	0.096565
AR7_B_27	163	7.4	0.17764	165000	2000	134000	1700	3090	200		0.0136957	0.00049141	0.805066	0.00712486	0.17764
AR7_B_28	163	7.4	-0.053906	114000	1400	92900	1100	3610	290		0.0226425	0.00109659	0.807833	0.00695089	-0.053906
AR7_B_29	163	7.4	0.19079	114000	2100	93200	1700	5410	180		0.0356851	0.000953589	0.810442	0.0105969	0.19079
AR7_B_30	163	7.4	-0.015758	121360	980	99370	670	8070	430		0.0493758	0.00154505	0.81169	0.00430688	-0.015758
AR7_B_31	163	7.4	0.071564	85100	1500	70100	1200	11460	270		0.100758	0.00227925	0.816581	0.01012	0.071564
AR7_B_32	163	7.4	-0.02382	72950	930	59820	820	7330	230		0.0761058	0.00180819	0.81289	0.0076752	-0.02382
AR7_B_33	163	7.4	0.26858	65000	1300	56100	1500	28500	1600		0.325031	0.0103586	0.855579	0.0144092	0.26858
AR7_B_34	163	7.4	0.27933	98400	640	80840	560	64860	710		0.498768	0.00992534	0.814408	0.0039032	0.27933
AR7_B_35	163	7.4	0.30065	79970	570	65290	430	26650	490		0.24965	0.0051892	0.809338	0.00396157	0.30065
ASH15D_1	163	7.4	0.051757	1682	70	931	68	1920000	35000		968.558	27.5098	0.548699	0.0232651	0.051757
ASH15D_2	163	7.4	0.34454	1529	61	676	34	1840000	38000		1069.55	26.5968	0.438278	0.0141915	0.34454
ASH15D_3	163	7.4	0.21619	1400	53	828	49	1250000	15000		788.023	20.3932	0.586291	0.0207744	0.21619
ASH15D_4	163	7.4	0.248	2475	54	1118	39	3300000	18000		1166.99	25.5487	0.447793	0.00929294	0.248
ASH15D_5	163	7.4	0.14487	1176	55	574	38	1440000	22000		1098.16	30.4116	0.483855	0.0197815	0.14487
ASH15D_6	163	7.4	0.30265	930	48	423	23	1190000	9300		1085.54	35.1226	0.450887	0.0170494	0.30265
ASH15D_7	163	7.4	0.27502	1124	38	402	24	2100000	19000		1537.22	36.8448	0.354544	0.0122691	0.27502
ASH15D_8	163	7.4	0.12554	1184	57	564	39	1520000	25000		1010.27	33.6981	0.472213	0.0200679	0.12554
ASH15D_9	163	7.4	0.20832	1277	40	425	24	2390000	23000		1476.33	34.6402	0.32992	0.0107458	0.20832
ASH15D_10	163	7.4	0.2408	1335	36	431	23	2660000	9600		1520.34	34.6095	0.320042	0.00965161	0.2408
ASH15D_11	163	7.4	0.28952	1379	38	489	29	2650000	13000		1435.02	33.1105	0.351524	0.0115945	0.28952
ASH15D_12	163	7.4	0.25191	1103	42	373	23	2140000	14000		1416.72	37.2547	0.335231	0.0122538	0.25191
ASH15D_13	163	7.4	0.20853	1351	43	462	30	2710000	26000		1424.81	34.2147	0.338998	0.0123649	0.20853
ASH15D_14	163	7.4	0.2181	1013	42	456	36	1830000	20000		1252.62	33.3279	0.446237	0.0200704	0.2181
ASH15D_15	163	7.4	0.29053	1762	43	823	30	2580000	12000		992.568	21.921	0.463025	0.0102447	0.29053
ASH15D_16	163	7.4	0.30954	883	40	437	22	1320000	12000		1002.36	29.9192	0.490604	0.0167584	0.30954
ASH15D_17	163	7.4	0.28249	893	33	258	18	2140000	29000		1574.15	38.3769	0.286404	0.0114049	0.28249
ASH15D_18	163	7.4	0.21161	765	29	221	15	1940000	9300		1633.17	43.5	0.286379	0.0112294	0.21161
ASH15D_19	163	7.4	0.0034639	673	44	284	40	1350000	15000		1274.17	45.9784	0.418325	0.0327633	0.0034639
ASH15D_20	163	7.4	0.46072	368	26	208	17	307000	11000		579.617	20.3301	0.560307	0.0305317	0.46072
ASH15D_21	163	7.4	0.51623	498	23	261	20	799000	24000		1010.17	33.3153	0.519543	0.0234455	0.51623
ASH15D_22	163	7.4	0.2466	475	22	174	14	969000	16000		1282.87	39.387	0.363133	0.017004	0.2466
ASH15D_23	163	7.4	0.24707	617	26	177	15	1550000	29000		1519.41	42.0538	0.28438	0.0135754	0.24707
ASH15D_24	163	7.4	0.39692	1139	31	572	23	1770000	11000		984.223	23.0115	0.497832	0.012192	0.39692
ASH15D_25	163	7.4	0.41792	806	26	517	23	981000	11000		769.928	18.5672	0.635867	0.0176242	0.41792
ASH15D_26	163	7.4	0.24451	952	33	347	21	2170000	10000		1458.98	36.0434	0.361329	0.0127105	0.24451
C_WC1_1	110	5	0.16659	71740	540	9810	120	1770000	12000		21.6214	0.40979	0.135556	0.000982013	0.16659
C_WC1_2	110	5	0.0064045	77560	370	9600	110	2120000	17000		23.9366	0.457367	0.1227	0.000768132	0.0064045
C_WC1_3	110	5	0.10855	69520	650	8300	110	1780000	23000		22.1025	0.420547	0.118353	0.000968204	0.10855
C_WC1_4	110	5	0.16164	83840	450	8980	110	2350000	19000		24.0815	0.459941	0.106178	0.000716224	0.16164
C_WC1_5	110	5	-0.031973	50480	500	6220	100	1330000	17000		22.1289	0.422313	0.122147	0.00116338	-0.031973
C_WC1_6	110	5	-0.1716	52330	380	9100	120	1380000	5900		22.1047	0.425951	0.172386	0.00130892	-0.1716
C_WC1_7	110	5	0.058096	64710	390	7630	73	1810000	16000		23.018	0.43848	0.116886	0.00066664	0.058096
C_WC1_8	110	5	0.10985	34090	260	6651	92	871000	8500		20.9483	0.407542	0.193406	0.00154089	0.10985
C_WC1_9	110	5	0.19293	81060	540	8320	120	2390000	17000		23.5998	0.446566	0.101748	0.000815332	0.19293
C_WC1_10	110	5	-0.044541	66450	300	8947	93	1900000	13000		22.9326	0.438917	0.133473	0.000762928	-0.044541
C_WC1_11	110	5	0.25356	60870	390	7362	89	1730000	13000		22.256	0.422163	0.119896	0.000827394	0.25356
C_WC1_12	110	5	-0.089634	48550	430	8244	90	1370000	17000		22.0296	0.421386	0.168329	0.00119355	-0.089634
C_WC1_13	110	5	0.40909	65470	460	8040	120	1960000	16000		22.8695	0.434277	0.121737	0.00101292	0.40909
C_WC1_14	110	5	0.03535	74090	440	8510	100	2240000	18000		23.0482	0.438294	0.113862	0.000756143	0.03535
C_WC1_15	110	5	0.10535	56000	640	5383	82	1770000	25000		23.5288	0.446787	0.0952899	0.000915286	0.10535
C_WC1_16	110	5	-0.05841	50990	330	5309	86	1600000	14000		23.4115	0.445671	0.103214	0.000908116	-0.05841
C_WC1_17	110	5	0.085019	60870	890	8380	230	1840000	25000		22.1131	0.420583	0.136474	0.00214063	0.085019
C_WC1_18	110	5	0.19554	35360	210	5991	86	1070000	7400		22.2147	0.427755	0.167957	0.00131603	0.19554
C_WC1_19	110	5	0.13207	43890	420	5708	82	1410000	16000		22.8639	0.435531	0.128923	0.00112243	0.13207
C_WC1_20	110	5	-0.11126	44540	300	5471	83	1560000	15000		24.8905	0.474615	0.121766	0.00101945	-0.11126
C_WC1_21	110	5	0.15156	42550	250	4283	60	1390000	10000		22.7079	0.432138	0.0997836	0.000764553	0.15156
C_WC1_22	110	5	0.25255	35620	230	4305	63	1170000	9700		22.7487	0.432945	0.119809	0.000966592	0.25255
C_WC1_23	110	5	-0.23732	43520	950	4120	110	1520000	42000		23.6408	0.45749	0.0938467	0.00163242	-0.23732
C_WC1_24	110	5	-0.14296	41570	290	5648	92	1400000	13000		22.8308	0.445834	0.134687	0.00120378	-0.14296
C_WC1_25	110	5	-0.17277	39030	430	2903	60	1380000	19000		23.6782	0.450954	0.0737325	0.000871021	-0.17277
C_WC1_26	110	5	-0.037047	33080	230	4686	66	1140000	9700		23.1374	0.444107	0.140426	0.00111251	-0.037047
C_WC1_27	110	5	0.09398	35010	380	2713	54	1250000	17000		23.5084	0.447847	0.0768189	0.000878422	0.09398
C_WC1_28	110	5	0.3221	40470	340	5836	95	1360000	14000		21.9619	0.417629	0.142953	0.00132081	0.3221
C_WC1_29	110	5	-0.32663	37070	220	3544	93	1280000	7000		22.4179	0.428741	0.0947724	0.00128606	-0.32663
C_WC1_30	110	5	0.069624	33670	190	4285	60	1210000	12000		23.3113	0.447338	0.126159	0.000960635	0.069624
C_WC1_31	110	5	0.15663	35370	370	3827	66	1240000	15000		22.3464	0.426073	0.107259	0.00109122	0.15663
C_WC1_32	110	5	0.37929	31090	220	4373	67	1090000	9600		22.4641	0.433153	0.139434	0.00118689	0.37929
C_WC1_33	110	5	0.26981	29250	320	2734	58	1060000	15000		22.7835	0.436303	0.0926581	0.00111552	0.26981
C_WC1_34	110	5	0.16762	35520	190	4270	67	1260000	6000		22.4331	0.427198	0.11917	0.000996428	0.16762
C_WC1_35	110	5	0.32822	34380	190	3637	57	1220000	5600		22.4804	0.426319	0.104869	0.000879	0.32822
C_WC1_36	110	5	0.32624	30700	180	4218	64	1080000	4700		22.3762	0.426802	0.136201	0.00111746	0.32624
C_WC1_37	110	5	0.21752	30780	360	4155	70	1010000	16000		20.8404	0.400564	0.133818	0.00138426	0.21752
C_WC1_38	110	5	-0.02511	18490	160	2660	56	613000	3500		21.0089	0.408053	0.142612	0.00163726	-0.02511
C_WC1_39	110	5	0.26636	32630	290	3796	72	1160000	12000		22.6727	0.431224	0.115324	0.00121839	0.26636
C_WC1_40	110	5	-0.056918	29700	250	3391	55	1070000	12000		22.8984	0.438582	0.113183	0.00104319	-0.056918
F14_A_1	110	5	0.34405	23710	310	16240	160	3130000	49000		84.2839	1.73703	0.678993	0.00560663	0.34405
F14_A_2	110	5	0.45773	12020	130	8220	92	1650000	12000		88.5413	1.74837	0.677919	0.00532178	0.45773
F14_A_3	110	5	0.48909	9150	150	5970	140	1710000	16000		121.07	2.52199	0.646791	0.00933424	0.48909
F14_A_4	110	5	0.35725	10180	100	7045	88	1510000	14000		95.6377	1.89438	0.686031	0.00549862	0.35725
F14_A_5	110	5	0.10643	7283	94	4056	82	2450000	32000		214.719	4.36861	0.552075	0.00667896	0.10643
F14_A_6	110	5	0.17936	10090	110	6140	94	2620000	33000		166.367	3.37961	0.603237	0.00571842	0.17936
F14_A_7	110	5	0.40233	16770	250	11500	180	2490000	31000		95.4324	1.85908	0.679791	0.00741137	0.40233
F14_A_8	110	5	0.43696	28540	210	19910	150	3600000	39000		80.7763	1.581	0.691557	0.00367329	0.43696
F14_A_9	110	5	0.48095	8018	83	4678	61	2420000	24000		191.447	3.78879	0.578369	0.00485686	0.48095
F14_A_10	110	5	0.22256	5292	91	2228	52	2660000	54000		317.658	6.44188	0.417355	0.00610257	0.22256
F14_A_11	110	5	0.096499	8950	100	5094	88	2720000	18000		195.844	3.83953	0.564217	0.00585486	0.096499
F14_A_12	110	5	0.30316	16410	160	10740	130	2970000	28000		116.642	2.25325	0.648793	0.00508622	0.30316
F14_A_13	110	5	-0.14328	38420	180	26510	290	5390000	29000		90.2008	1.72186	0.684011	0.00410564	-0.14328
F14_A_14	110	5	0.40944	12880	120	8351	80	2660000	18000		132.321	2.56591	0.642737	0.00433212	0.40944
F14_A_15	110	5	0.31632	6717	82	3042	52	3150000	39000		300.977	6.03527	0.448946	0.00475652	0.31632
F14_A_16	110	5	0.37432	6138	81	2546	56	3260000	13000		339.949	6.83106	0.41119	0.00531979	0.37432
F14_A_17	110	5	0.18279	7010	73	3610	68	2900000	50000		262.314	5.58581	0.510505	0.00554207	0.18279
F14_A_18	110	5	0.086214	7580	140	4047	97	2860000	24000		241.256	4.97116	0.529267	0.00807773	0.086214
F14_A_19	110	5	0.53901	16520	130	11250	100	2550000	13000		98.6814	1.90656	0.675077	0.00404227	0.53901
F14_A_20	110	5	0.20056	7830	110	4681	93	1950000	10000		159.508	3.27038	0.592635	0.0072734	0.20056
F14_A_21	110	5	0.20693	6768	76	3645	71	2420000	13000		229.258	4.51351	0.533885	0.00605447	0.20693
F14_A_22	110	5	0.2696	10230	120	5471	91	3620000	33000		226.987	4.46494	0.530154	0.00544249	0.2696
F14_A_23	110	5	0.27623	7584	74	3852	58	3140000	28000		263.425	5.24285	0.503499	0.00455653	0.27623
F14_A_24	110	5	0.40079	12380	110	8420	86	2240000	20000		115.163	2.27803	0.674221	0.0046037	0.40079
F14_A_25	110	5	0.37677	17770	120	12131	95	2890000	20000		103.345	1.98328	0.676737	0.00352962	0.37677
F14_A_26	110	5	0.34995	20700	130	14070	110	3360000	13000		102.666	1.97496	0.673805	0.0034081	0.34995
F14_A_27	110	5	0.16225	8269	84	5277	72	1770000	28000		134.554	2.83099	0.632623	0.00542775	0.16225
F14_A_28	110	5	0.47848	9900	120	5113	69	3820000	39000		245.61	4.86867	0.511978	0.00468419	0.47848
F14_A_29	110	5	0.43032	6298	69	3831	50	1620000	13000		163.694	3.20368	0.603004	0.0051827	0.43032
F14_A_30	110	5	0.031684	6694	74	3568	67	2470000	27000		235.148	4.81019	0.528384	0.00580729	0.031684
F14_A_31	110	5	0.11365	12460	120	8730	110	1550000	19000		79.2388	1.70744	0.694555	0.00555586	0.11365
F14_A_32	110	5	0.28198	9000	89	5546	64	2390000	24000		168.585	3.38691	0.610869	0.00468246	0.28198
F14_A_33	110	5	0.33688	6712	72	3554	51	2470000	18000		233.241	4.58777	0.524899	0.00474333	0.33688
F14_A_34	110	5	0.2419	21140	140	15140	130	2280000	29000		68.1572	1.34119	0.709956	0.00388301	0.2419
F14_A_35	110	5	0.50171	11310	150	6820	120	3180000	27000		178.723	3.44472	0.597768	0.00664328	0.50171
F14_A_36	110	5	0.50989	6812	76	3602	50	2490000	15000		233.24	4.57547	0.524179	0.00470846	0.50989
F14_A_37	110	5	0.37055	6559	90	3192	59	2920000	28000		284.24	5.5865	0.482432	0.0056015	0.37055
F14_A_38	110	5	0.39188	10580	100	6340	86	2970000	10000		179.049	3.48215	0.594038	0.00495362	0.39188
F14_A_39	110	5	-0.55555	164570	970	109780	510	29300000	520000		114.118	2.29064	0.661277	0.00250314	-0.55555
F14_A_40	110	5	0.46254	11740	130	8006	94	1730000	11000		93.7772	1.84585	0.676018	0.00550299	0.46254
F14_A_41	110	5	0.33058	22100	150	15560	120	2960000	20000		85.2042	1.63498	0.697956	0.00361663	0.33058
F14_B_1	110	5	0.025964	77350	490	59140	410	3010000	42000		24.4259	0.487223	0.757934	0.0035901	0.025964
F14_B_2	110	5	0.20457	87220	310	67370	260	2630000	20000		19.2222	0.37066	0.765704	0.00202627	0.20457
F14_B_3	110	5	0.26727	121970	600	95330	470	1970000	19000		10.2307	0.198571	0.774796	0.00272173	0.26727
F14_B_4	110	5	0.29144	58060	680	45690	520	644000	11000		6.95734	0.136087	0.780108	0.00642577	0.29144
F14_B_5	110	5	0.21111	88400	950	69880	760	226000	1100		1.62336	0.0322011	0.78363	0.0060432	0.21111
F14_B_6	110	5	0.4172	72300	900	58090	630	200000	2300		1.75322	0.0376014	0.796478	0.00663249	0.4172
F14_B_7	110	5	0.33971	59270	780	46540	660	580000	9500		6.16289	0.119452	0.778399	0.00759576	0.33971
F14_B_8	110	5	0.23312	29660	260	23180	210	474000	4200		10.2181	0.19694	0.774735	0.00492605	0.23312
F14_B_9	110	5	0.25029	25020	160	19210	160	818000	5200		20.6936	0.401536	0.761116	0.00403118	0.25029
F14_B_10	110	5	0.10964	30370	460	23520	350	801000	9800		16.4753	0.330238	0.767721	0.00822211	0.10964
F14_B_11	110	5	0.42152	20060	250	15300	200	445000	3400		13.9624	0.277416	0.756086	0.00688758	0.42152
F14_B_12	110	5	0.33065	53120	300	42000	220	124650	960		1.4861	0.0285251	0.783794	0.00304515	0.33065
F14_B_13	110	5	0.054139	52240	260	41350	240	113000	1000		1.37503	0.0266762	0.784663	0.00302598	0.054139
F14_B_14	110	5	0.27223	57100	610	44810	480	536000	3800		5.93452	0.114385	0.777946	0.00593615	0.27223
F14_B_15	110	5	-0.023407	48920	730	37600	640	1140000	6200		14.8217	0.300241	0.761925	0.00869913	-0.023407
F14_B_16	110	5	0.095788	46110	300	36120	290	1160000	15000		15.9871	0.323655	0.776539	0.00404755	0.095788
F14_B_17	110	5	0.11061	26710	310	20880	250	540000	11000		12.6957	0.276414	0.774938	0.00651772	0.11061
F14_B_18	110	5	0.15375	14610	110	11292	96	386000	4700		16.6965	0.342778	0.766181	0.00438859	0.15375
F14_B_19	110	5	0.4428	19460	150	15150	130	482000	4800		15.6787	0.312478	0.771757	0.00448995	0.4428
F14_B_20	110	5	0.31774	15480	140	11980	110	287000	3700		11.6616	0.230477	0.767179	0.00498703	0.31774
F14_B_21	110	5	0.27656	19870	160	15810	140	49960	510		1.59137	0.0319094	0.78876	0.00476165	0.27656
F14_B_22	110	5	0.32283	15460	140	12260	110	55340	630		2.24695	0.045245	0.786125	0.00505459	0.32283
F14_B_23	110	5	0.37444	12050	130	9430	93	130000	1900		6.8526	0.133902	0.775774	0.00571936	0.37444
F14_B_24	110	5	0.36402	6680	170	5020	130	374000	7300		35.4124	0.724277	0.744968	0.0136427	0.36402
F14_B_25	110	5	0.25222	5703	93	4452	83	76610	740		8.51035	0.18414	0.77386	0.00966781	0.25222
F14_B_26	110	5	0.26543	6020	100	4530	100	254000	7000		26.5481	0.639574	0.745954	0.0103945	0.26543
F14_B_27	110	5	0.39034	5964	99	4642	94	146000	4000		15.294	0.362756	0.771575	0.01019	0.39034
F14_B_28	110	5	0.11766	11390	120	8700	110	553000	11000		30.2377	0.612958	0.757192	0.00628548	0.11766
F14_B_29	110	5	0.16125	10820	130	8450	100	254000	6100		14.8044	0.30752	0.774177	0.0065852	0.16125
F14_B_30	110	5	0.43656	6377	75	5169	67	60020	610		5.97357	0.123095	0.803527	0.00709343	0.43656
F14_B_31	110	5	0.25492	7940	120	6170	110	157000	1700		12.5638	0.272849	0.770327	0.009081	0.25492
F14_B_32	110	5	0.24075	8520	100	6809	88	31750	450		2.35229	0.0492742	0.792236	0.00697613	0.24075
F14_B_33	110	5	0.32858	8995	99	6646	84	573000	6000		39.878	0.811893	0.732436	0.00619145	0.32858
F14_B_34	110	5	0.36419	32900	370	26080	310	67840	620		1.30146	0.0251666	0.785819	0.00648574	0.36419
F14_B_35	110	5	0.24238	51890	310	41060	240	61390	530		0.744388	0.0146324	0.784415	0.00330679	0.24238
F14_B_36	110	5	0.20711	17230	120	13460	110	44550	880		1.62818	0.0350582	0.774409	0.00419403	0.20711
F14_B_37	110	5	0.249	7942	89	6238	73	68200	1100		5.41371	0.118113	0.778621	0.00636316	0.249
F14_B_38	110	5	0.63624	5091	86	3598	56	543000	4800		67.6763	1.44447	0.700598	0.00811674	0.63624
F14_B_39	110	5	0.43853	5711	73	4405	57	112000	1200		12.407	0.251038	0.764618	0.00701463	0.43853
F14_B_40	110	5	0.42005	7361	77	5716	71	297000	3000		25.6811	0.511872	0.769779	0.00630506	0.42005
F14_B_41	110	5	0.23081	10550	120	8047	94	278000	6500		16.4148	0.400118	0.756122	0.00621806	0.23081
F14_B_42	110	5	0.32118	12430	220	9790	190	168000	2400		8.59918	0.168566	0.780768	0.0103438	0.32118
F14_B_43	110	5	0.4606	11910	120	9214	97	64720	520		3.45201	0.068032	0.766915	0.00563673	0.4606
F14_B_44	110	5	0.48511	6147	78	4764	63	237000	2400		24.2906	0.492577	0.768279	0.00710197	0.48511
F14_B_45	110	5	0.40405	5490	170	4180	130	187000	2200		21.3793	0.522883	0.75477	0.0167076	0.40405
F14_B_46	110	5	0.31272	16490	140	12970	130	38190	490		1.47437	0.0300345	0.779704	0.00516581	0.31272
F14_B_47	110	5	0.26175	8750	110	6797	89	300000	2700		21.5459	0.453459	0.770052	0.00705022	0.26175
F14_B_48	110	5	0.26341	23580	610	18490	470	24760	560		0.673711	0.017795	0.777327	0.0142195	0.26341
F14_B_49	110	5	0.42472	17160	190	13420	130	296000	1900		10.9477	0.21932	0.775257	0.00575265	0.42472
F14_B_50	110	5	0.25754	43660	450	34490	370	95710	760		1.38255	0.0268283	0.783105	0.00587607	0.25754
F14_B_51	110	5	0.32634	20010	150	15760	150	78500	1500		2.47269	0.0512338	0.780764	0.00477106	0.32634
G_NIST614_1	110	5	0.17865	209000	2500	183000	2100	308000	2700		1.30413	0.0247049	0.867991	0.00725701	0.17865
G_NIST614_2	110	5	0.32535	206000	2200	179000	1900	310000	3000		1.33413	0.0252323	0.861383	0.00654188	0.32535
G_NIST614_3	110	5	0.37511	208000	2900	182000	2500	312000	3500		1.31822	0.0249398	0.867399	0.00856286	0.37511
G_NIST614_4	110	5	0.22726	206000	2600	181000	2300	318000	2900		1.33157	0.0252453	0.871008	0.00786827	0.22726
G_NIST614_5	110	5	0.13172	205000	2500	179000	2200	324000	2900		1.33854	0.0253477	0.865585	0.00755908	0.13172
G_NIST614_6	110	5	0.27635	202000	2700	177000	2400	325000	3400		1.32807	0.0251284	0.868625	0.0083417	0.27635
G_NIST614_7	110	5	0.28227	202000	2700	177000	2400	328000	3500		1.31047	0.0247864	0.868625	0.0083417	0.28227
G_NIST614_8	110	5	0.25817	201000	2900	175000	2500	327000	3700		1.28742	0.0243793	0.863083	0.00883872	0.25817
G_NIST614_9	110	5	0.42301	189000	2600	166000	2300	325000	3600		1.31792	0.0249339	0.870677	0.00857438	0.42301
G_NIST614_10	110	5	0.29504	183000	2800	160000	2400	323000	4100		1.32739	0.0251109	0.866721	0.0093669	0.29504
G_NIST614_11	110	5	0.26415	169000	2800	150000	2500	309000	4200		1.33526	0.0253034	0.879863	0.0104293	0.26415
G_NIST614_12	110	5	0.2934	162000	2700	142000	2300	300000	4000		1.32724	0.0251431	0.868928	0.0101857	0.2934
G_NIST614_13	110	5	0.8256	150000	2500	132000	2200	283000	4300		1.31776	0.0250051	0.872355	0.0103709	0.8256
G_NIST614_14	110	5	0.41481	132000	2300	116000	2100	280000	4400							outlier***
G_NIST614_15	110	5	0.32914	128000	2300	113000	2000	257000	3800		1.34241	0.025412	0.875143	0.011133	0.32914
G_NIST614_16	110	5	0.3631	119000	2100	105000	1800	242000	3700		1.33607	0.0252636	0.874688	0.0108542	0.3631
G_NIST614_17	110	5	0.34001	117000	2000	104000	1800	239000	3600		1.32462	0.0250656	0.881167	0.0108116	0.34001
G_NIST614_18	110	5	0.34555	115000	2100	101000	1800	232000	3700		1.30014	0.0246163	0.870631	0.0112049	0.34555
G_NIST614_19	110	5	0.40297	109000	1900	96100	1700	223000	3700		1.3056	0.024691	0.873992	0.0109479	0.40297
G_NIST614_20	110	5	0.4211	106000	1800	92800	1600	218000	3400		1.31065	0.0248233	0.867866	0.0105931	0.4211
G_NIST614_21	110	5	0.3793	101000	1800	89400	1600	210000	3300		1.32197	0.025079	0.877459	0.0111781	0.3793
G_NIST614_22	110	5	0.4405	98100	1800	86200	1500	203000	3400		1.32288	0.0250227	0.871062	0.0111102	0.4405
G_NIST614_23	110	5	0.31074	95800	1800	84400	1600	200000	3400		1.33751	0.0253385	0.873348	0.0117574	0.31074
JT_1	163	7.4	0.48518	1506	48	631	30	459000	8300		270.183	6.43705	0.415351	0.0119912	0.48518
JT_2	163	7.4	0.23294	2245	70	546	34	912000	8900		356.892	8.51962	0.241094	0.00846862	0.23294
JT_3	163	7.4	0.21674	2397	49	603	29	949000	6100		351.241	7.49577	0.249379	0.00657302	0.21674
JT_4	163	7.4	0.29086	1910	46	633	29	703000	10000		325.482	7.00773	0.328534	0.00857669	0.29086
JT_5	163	7.4	0.028357	2052	45	955	38	532000	12000		223.438	5.09682	0.461356	0.0105724	0.028357
JT_6	163	7.4	0.34071	2264	52	759	30	774000	5800		288.003	6.15936	0.332335	0.00766284	0.34071
JT_7	163	7.4	0.20863	1631	93	746	56	434000	10000		221.715	6.55707	0.453415	0.0215584	0.20863
JT_8	163	7.4	0.040791	11770	790	8460	590	329000	9000		22.9481	0.783007	0.712532	0.034786	0.040791
JT_9	163	7.4	0.3393	1254	34	452	21	450000	3700		282.897	6.33986	0.357315	0.00969473	0.3393
JT_10	163	7.4	0.27524	4232	70	429	27	2410000	15000		437.326	8.87443	0.10049	0.00329831	0.27524
JT_11	163	7.4	0.12507	2618	60	706	40	1200000	7200		341.735	7.35201	0.267329	0.00824076	0.12507
JT_12	163	7.4	0.18723	1514	46	367	26	746000	9800		361.571	8.08215	0.240298	0.00934287	0.18723
JT_13	163	7.4	0.013815	1417	40	347	49	704000	4400		353.426	8.30364	0.242756	0.0176321	0.013815
JT_14	163	7.4	0.15127	1482	44	507	31	633000	12000		295.773	6.473	0.339133	0.0116266	0.15127
JT_15	163	7.4	0.0082544	1377	43	392	24	677000	6800		333.838	7.71127	0.282204	0.00978268	0.0082544
JT_16	163	7.4	0.046208	1152	31	460	31	463000	3300		268.397	6.16593	0.395837	0.0144879	0.046208
JT_17	163	7.4	0.43648	777	36	345	23	280000	5700		235.7	6.41675	0.440158	0.0180238	0.43648
JT_18	163	7.4	0.38959	754	29	356	21	251000	1600		217.467	5.72555	0.468047	0.0166243	0.38959
JT_19	163	7.4	-0.12916	3130	290	2140	240	256000	2300		52.0876	2.52612	0.677766	0.0497298	-0.12916
JT_20	163	7.4	0.45442	1301	58	688	47	367000	4600		179.576	5.47366	0.52423	0.0215691	0.45442
JT_21	163	7.4	0.53658	1183	44	514	29	386000	2200		208.426	5.66804	0.430714	0.0146806	0.53658
JT_22	163	7.4	0.43746	953	41	417	19	379000	17000		250.827	6.29183	0.433764	0.0137101	0.43746
JT_23	163	7.4	0.45135	1487	56	871	44	364000	3200		156.111	4.249	0.580655	0.0184537	0.45135
JT_24	163	7.4	0.54742	1123	39	621	33	381000	2700		215.582	5.714	0.548179	0.0175522	0.54742
JT_25	163	7.4	0.37081	1178	32	451	23	501000	7700		264.906	6.03883	0.379526	0.0110609	0.37081
JT_26	163	7.4	0.5312	591	27	322	17	142000	1100		152.585	4.50462	0.540106	0.0190196	0.5312
JT_27	163	7.4	0.24611	1618	38	275	16	1060000	13000		416.52	8.88903	0.168486	0.00533201	0.24611
JT_28	163	7.4	0.35021	555	22	130	10	289000	2200		328.829	8.99341	0.232199	0.0101348	0.35021
G_NIST614_14	110	5	0.41481	132000	2300	116000	2100	280000	4400		1.44198	0.0273546	0.871138	0.0110404	0.41481	outlier***
